# 1 Integrative analysis of the plasma proteome and polygenic 2 risk of cardiometabolic diseases

3 Scott C. Ritchie<sup>1-4,\*</sup>, Samuel A. Lambert<sup>1-3,5</sup>, Matthew Arnold<sup>3</sup>, Shu Mei Teo<sup>1,2</sup>, Sol Lim<sup>1-3</sup>, Petar  
4 Scepanovic<sup>1-3</sup>, Jonathan Marten<sup>1,3</sup>, Sohail Zahid<sup>6,7</sup>, Mark Chaffin<sup>6</sup>, Yingying Liu<sup>8,9</sup>, Gad Abraham<sup>1,2,10</sup>,  
5 Willem H. Ouwehand<sup>4,11-14</sup>, David J. Roberts<sup>12,14,15</sup>, Nicholas A. Watkins<sup>12</sup>, Brian G. Drew<sup>9,16</sup>, Anna C.  
6 Calkin<sup>8,16</sup>, Emanuele Di Angelantonio<sup>3-5,14</sup>, Nicole Soranzo<sup>4,13,14</sup>, Stephen Burgess<sup>17</sup>, Michael  
7 Chapman<sup>3,5,13</sup>, Sekar Kathiresan<sup>18</sup>, Amit V. Khera<sup>6,7,19,20</sup>, John Danesh<sup>3-5,13,14</sup>, Adam S. Butterworth<sup>3-5,13,14</sup>,  
8 Michael Inouye<sup>1-5,10,21,\*</sup>

9

10 <sup>1</sup>Cambridge Baker Systems Genomics Initiative, Department of Public Health and Primary Care, University of Cambridge,  
11 Cambridge, UK

12 <sup>2</sup>Cambridge Baker Systems Genomics Initiative, Baker Heart & Diabetes Institute, Melbourne, Victoria, Australia

13 <sup>3</sup>British Heart Foundation Cardiovascular Epidemiology Unit, Department of Public Health and Primary Care, University of  
14 Cambridge, Cambridge, UK

15 <sup>4</sup>British Heart Foundation Centre of Research Excellence, University of Cambridge, Cambridge, UK

16 <sup>5</sup>Health Data Research UK Cambridge, Wellcome Genome Campus and University of Cambridge, Cambridge, UK

17 <sup>6</sup>Cardiovascular Disease Initiative, Broad Institute of MIT and Harvard, Cambridge, MA, USA

18 <sup>7</sup>Department of Medicine, Harvard Medical School, Boston, MA, USA

19 <sup>8</sup>Lipid Metabolism & Cardiometabolic Disease Laboratory, Baker Heart & Diabetes Institute, Melbourne, Victoria, Australia

20 <sup>9</sup>Molecular Metabolism & Ageing Laboratory, Baker Heart & Diabetes Institute, Melbourne, Victoria, Australia

21 <sup>10</sup>Department of Clinical Pathology, University of Melbourne, Parkville, Victoria, Australia

22 <sup>11</sup>Department of Haematology, University of Cambridge, Cambridge, UK

23 <sup>12</sup>National Health Service (NHS) Blood and Transplant, Cambridge Biomedical Campus, Cambridge, UK

24 <sup>13</sup>Department of Human Genetics, Wellcome Sanger Institute, Hinxton, UK

25 <sup>14</sup>National Institute for Health Research Blood and Transplant Research Unit in Donor Health and Genomics, University of  
26 Cambridge, Cambridge, UK

27 <sup>15</sup>National Institute for Health Research Oxford Biomedical Research Centre, University of Oxford and John Radcliffe Hospital,  
28 Oxford, UK

29 <sup>16</sup>Central Clinical School, Monash University, Melbourne, Victoria, Australia

30 <sup>17</sup>MRC Biostatistics Unit, University of Cambridge, Cambridge, UK

31 <sup>18</sup>Verve Therapeutics, Cambridge, MA USA

32 <sup>19</sup>Center for Genomic Medicine, Massachusetts General Hospital, Boston, MA, USA

33 <sup>20</sup>Division of Cardiology, Massachusetts General Hospital, Boston, MA, USA

34 <sup>21</sup>The Alan Turing Institute, London, UK

35

36 \* Corresponding authors: [mi336@medschl.cam.ac.uk](mailto:mi336@medschl.cam.ac.uk) (MI) or [sr827@medschl.cam.ac.uk](mailto:sr827@medschl.cam.ac.uk) (SCR)

## 37 Summary Paragraph

38 Common human diseases are frequently polygenic in architecture, comprising a large number of risk alleles  
39 with small effects spread across the genome<sup>1-3</sup>. Polygenic scores (PGSs) aggregate these alleles into a  
40 metric which represents an individual's genetic predisposition to a specific disease. PGSs have shown  
41 promise for early risk prediction<sup>4-7</sup>, and there is potential to use PGSs to understand disease biology in  
42 parallel<sup>8</sup>. Here, we investigate the role plasma protein levels play in cardiometabolic disease risk in a cohort  
43 of 3,087 healthy individuals using PGSs. We found PGSs for coronary artery disease (CAD), type 2  
44 diabetes (T2D), chronic kidney disease (CKD), and ischaemic stroke (IS) were associated with levels of 49  
45 plasma proteins. These associations were polygenic in architecture, largely independent of *cis* protein  
46 QTLs, and robust to environmental variation. Over a median 7.7 years follow-up, 28 of these plasma  
47 proteins were associated with future myocardial infarction (MI) or T2D events, 16 of which were causal  
48 mediators between polygenic risk and incident disease. These protein mediators of polygenic disease risk  
49 included targets of approved therapies which may have repurposing potential. Our results demonstrate that  
50 PGSs can identify proteins with causal roles in disease, and may have utility in drug development.

## 51 Main Text

52 Cardiometabolic diseases have a major polygenic component, which is due to the combination of many  
53 thousands of variants across the genome, each exerting small lifelong effects<sup>9-13</sup>. Risk stratification using  
54 cardiometabolic PGSs have shown potential clinical utility for disease prevention<sup>14</sup>; however, molecular  
55 mediators of polygenic risk and their potential to be modulated to reduce disease risk remains unknown.  
56 Variants associated with polygenic traits are spread across many different pathways, exerting their effects  
57 through multiple levels of regulation, including gene expression, proteins and their interactions, cell  
58 morphology, and higher order physiological processes<sup>15</sup>. Proteins that are pathway-level hubs through  
59 which polygenic effects converge, however, could be promising targets for pharmaceutical intervention<sup>16-</sup>  
60 <sup>19</sup>.

61 Here, we demonstrate how PGSs can be used to identify proteins with causal roles in disease aetiology. The  
62 INTERVAL cohort comprises approximately 50,000 adult blood donors in England<sup>20,21</sup>, of which 3,087  
63 participants have linked electronic hospital records, imputed genome-wide genotypes, and quantitative  
64 levels of 3,438 plasma proteins<sup>22</sup> (**Online Methods, Supplementary Data 1,2**). The characteristics of the  
65 participants are given in **Extended Data Table 1**; and participants with history of any cardiometabolic  
66 disease were excluded (**Online Methods, Supplementary Table 1**), reducing the potential for reverse  
67 causality in downstream analysis. A schematic of the study is given in **Extended Data Fig. 1**.

68 To quantify each participant's relative polygenic risk of atrial fibrillation (AF), CAD, CKD, IS, and T2D  
69 we applied externally derived genome-wide PGSs comprised of 1.8–3.2 million variants (**Online**  
70 **Methods**). Using PGSs, we identified 49 proteins whose levels differed with respect to polygenic risk at a  
71 false discovery rate (FDR) of 5% (**Fig. 1a,b, Extended Data Table 2,3, Supplementary Table 2,3**): 31  
72 proteins for the T2D PGS, 11 proteins for the CAD PGS, 1 protein for the IS PGS, and 8 proteins for the  
73 CKD PGS. Associations included proteins with established roles in cardiometabolic disease, such as

74 cystatin-c (CST3) and beta-2-macroglobulin (B2M) which are biomarkers for chronic kidney disease<sup>23</sup>,  
75 apolipoprotein E (APOE) whose link to coronary artery disease has been extensively studied<sup>24,25</sup>, and  
76 fructose-1,6-bisphosphatase 1 (FBP1) which plays a key role in glucose regulation and is a target of type 2  
77 diabetes drugs<sup>26</sup>. Associated proteins belonged to multiple non-overlapping pathways (**Supplementary**  
78 **Information**), and many are relatively understudied in the context of their respective diseases (**Extended**  
79 **Data Table 4**) warranting future study.

80 PGS to protein associations were robust to technical, physiological, and environmental confounding  
81 (**Supplementary Information**). We observed directional consistency and strong correlation of effect sizes  
82 when utilizing an orthogonal proteomics technology in independent samples (**Extended Data Fig. 2a-c**).  
83 Protein levels and PGS to protein associations were also temporally stable over two years of follow-up  
84 (**Extended Data Fig. 2c-d**). PGS to protein associations were also robust to circadian and seasonal effects,  
85 inclusion of participants with any prevalent cardiometabolic disease, and body mass index (BMI), with the  
86 exception of six T2D PGS to protein associations that were partially mediated by BMI (**Extended Data**  
87 **Fig. 2f-g**).

88 Most PGS to protein associations were not explained by protein quantitative trait loci (pQTLs) but instead  
89 were highly polygenic (**Online Methods; Fig. 1c**): each protein required a median 12% of the genome to  
90 explain its association with a PGS (**Fig. 1c**). Only four associations could be explained by pQTLs, and  
91 contributing loci were spread across the genome for the remaining 46 (**Extended Data Fig. 3**).  
92 Interestingly, the effects of PGSs and pQTLs on protein levels were largely independent (**Online Methods,**  
93 **Supplementary Table 4**), suggesting that polygenic risk can enhance or buffer locus-specific effects on  
94 protein levels.

95 Three possible scenarios could explain a PGS to protein association<sup>27</sup>: (1) the protein plays a causal role in  
96 disease, (2) the protein levels are changing in response to disease processes, but are not themselves causal  
97 (reverse causality), and (3) the protein levels are correlated with some other causal factor (confounding)  
98 (**Fig. 2a**). Utilizing a median of 7.7 years of follow-up in nation-wide electronic hospital records, we  
99 examined whether levels of PGS-associated proteins were associated with risk of onset of the respective  
100 cardiometabolic disease, then performed mediation analysis<sup>28</sup> to identify the proteins that mediate PGS to  
101 disease associations, and thereby play causal roles in disease pathogenesis (**Online Methods**). Limited by  
102 the number of incident disease events, we restricted our analyses to CAD and T2D (**Extended Data Fig. 4**).

103 25 of 31 (81%) of T2D PGS proteins were significantly associated ( $P < 0.05$ ) with increased risk of T2D  
104 and 3 of 11 (27%) of CAD PGS proteins were significantly associated with increased risk of incident MI  
105 (**Fig. 2b, Extended Data Table 2**). There was directional consistency and strong correlation (Pearson  
106 correlation: 0.96,  $P = 4 \times 10^{-23}$ ) between effects of PGSs on protein levels and hazard ratios for protein levels  
107 on incident disease risk (**Fig. 2c**). Using mediation analysis, we found that one and 15 proteins were  
108 significant mediators between polygenic risk of MI and T2D, respectively, indicating causal roles in disease  
109 pathogenesis (**Fig. 2d**).

110 As polygenic disease risk is itself estimated from population-level data, it is unlikely that any single protein  
111 explains polygenic risk. Here, we found that causal protein mediators each explained a median of 6.6% of  
112 PGS to disease associations (**Extended Data Table 2**), with the 1 CAD PGS mediator (APOE) explaining  
113 5.4% of CAD polygenic risk to incident MI association, and the 15 T2D PGS mediators explaining 27% of  
114 the T2D polygenic risk to incident T2D association. A complementary approach for causal inference,

115 Mendelian randomisation<sup>29</sup> (**Online Methods**), also supported causal effects on T2D for two proteins  
116 (SHBG and CFI) which mediated the T2D PGS to T2D association (**Supplementary Information**,  
117 **Extended Data Fig. 5, Supplementary Table 5, 6**). Notably, only 12 (24%) of the proteins associated  
118 with PGSs could be tested with Mendelian randomisation due to lack of *cis* protein quantitative trait loci  
119 (pQTLs) as genetic instruments (**Online Methods**) highlighting the complementarity of our PGS-protein  
120 association approach.

121 Finally, to identify druggable targets associated with polygenic disease risk and potential drug repurposing  
122 opportunities, we utilised the DrugBank database<sup>30</sup> (**Online Methods**) to find that 18 of the 49 PGS-  
123 associated proteins were targeted by 236 drugs (**Extended Data Table 5, Supplementary Table 7**). Ten  
124 licensed drugs had protein target effects which were consistent with reduction of cardiometabolic disease  
125 risk (**Table 1**). These included the well-known T2D drug metformin<sup>31</sup>, which reduces liver glucose  
126 production by inhibition of FBP1<sup>32</sup>, a protein whose levels were elevated in people with high polygenic risk  
127 for T2D (**Fig. 1**). Among the other nine licensed drugs, we highlight the potential to repurpose pegvisomant  
128 for T2D prevention. Pegvisomant (DB00082) is used to treat acromegaly by blocking the binding of  
129 endogenous growth hormone to growth hormone receptor (GHR)<sup>33-35</sup>. We found increased GHR was a  
130 causal mediator of polygenic T2D risk and incident T2D (**Fig. 2**) and GHR loss-of-function mutations are  
131 associated with lower T2D risk<sup>36</sup> providing additional genetic support for this target. Furthermore,  
132 pegvisomant has been shown to improve insulin sensitivity in acromegaly patients<sup>37,38</sup>. Together, these  
133 observations suggest pegvisomant is a priority to evaluate for repurposing for T2D prevention (**Table 1**).

#### 134 **Conclusions**

135 Polygenic scores for disease are explicitly constructed to maximise risk prediction, typically without  
136 consideration of the underlying biology. However, PGSs also hold considerable promise for identifying  
137 molecular pathways in the development and progression of disease<sup>8,27</sup>. Here, we identified plasma proteins  
138 significantly associated with PGSs for cardiometabolic disease in a healthy pre-disease cohort. The vast  
139 majority of these associations were highly polygenic, revealing an unappreciated role for polygenic effects  
140 on protein levels, including for several well-known disease proteins. These proteins were predictive of  
141 incident disease, and 16 were mediators of type 2 diabetes or myocardial infarction, suggesting that their  
142 modulation is likely to attenuate disease risk. There are multiple licensed drugs for many of these targets.  
143 Overall, this study demonstrates the power of polygenic scores to elucidate novel disease biology and their  
144 potential to inform development of medicines.

## 145 **References**

- 146 1. International Schizophrenia Consortium *et al.* Common polygenic variation contributes to risk of  
147 schizophrenia and bipolar disorder. *Nature* **460**, 748–752 (2009).
- 148 2. Loh, P.-R. *et al.* Contrasting genetic architectures of schizophrenia and other complex diseases using  
149 fast variance-components analysis. *Nat. Genet.* **47**, 1385–1392 (2015).
- 150 3. Khera, A. V. *et al.* Genome-wide polygenic scores for common diseases identify individuals with risk  
151 equivalent to monogenic mutations. *Nat. Genet.* **50**, 1219–1224 (2018).
- 152 4. Lambert, S. A., Abraham, G. & Inouye, M. Towards clinical utility of polygenic risk scores. *Hum.*  
153 *Mol. Genet.* **28**, R133–R142 (2019).
- 154 5. Torkamani, A., Wineinger, N. E. & Topol, E. J. The personal and clinical utility of polygenic risk  
155 scores. *Nat. Rev. Genet.* **19**, 581–590 (2018).
- 156 6. Chatterjee, N., Shi, J. & García-Closas, M. Developing and evaluating polygenic risk prediction  
157 models for stratified disease prevention. *Nat. Rev. Genet.* **17**, 392–406 (2016).
- 158 7. McCarthy, M. I. & Mahajan, A. The value of genetic risk scores in precision medicine for diabetes.  
159 *Expert Review of Precision Medicine and Drug Development* **3**, 279–281 (2018).
- 160 8. International Common Disease Alliance. *International Common Disease Alliance Recommendations*  
161 *and White Paper.* (2020).
- 162 9. Nielsen, J. B. *et al.* Biobank-driven genomic discovery yields new insight into atrial fibrillation  
163 biology. *Nat. Genet.* **50**, 1234–1239 (2018).
- 164 10. Wuttke, M. *et al.* A catalog of genetic loci associated with kidney function from analyses of a million  
165 individuals. *Nat. Genet.* **51**, 957–972 (2019).
- 166 11. Mahajan, A. *et al.* Refining the accuracy of validated target identification through coding variant fine-  
167 mapping in type 2 diabetes. *Nat. Genet.* **50**, 559–571 (2018).
- 168 12. Malik, R. *et al.* Multiancestry genome-wide association study of 520,000 subjects identifies 32 loci  
169 associated with stroke and stroke subtypes. *Nat. Genet.* **50**, 524–537 (2018).

- 170 13. Nelson, C. P. *et al.* Association analyses based on false discovery rate implicate new loci for coronary  
171 artery disease. *Nat. Genet.* **49**, 1385–1391 (2017).
- 172 14. Sun, L. *et al.* Polygenic risk scores in cardiovascular risk prediction: A cohort study and modelling  
173 analyses. *PLoS Med.* **18**, e1003498 (2021).
- 174 15. Erdmann, J., Kessler, T., Munoz Venegas, L. & Schunkert, H. A decade of genome-wide association  
175 studies for coronary artery disease: the challenges ahead. *Cardiovasc. Res.* **114**, 1241–1257 (2018).
- 176 16. Boyle, E. A., Li, Y. I. & Pritchard, J. K. An Expanded View of Complex Traits: From Polygenic to  
177 Omnigenic. *Cell* **169**, 1177–1186 (2017).
- 178 17. Liu, X., Li, Y. I. & Pritchard, J. K. Trans Effects on Gene Expression Can Drive Omnigenic  
179 Inheritance. *Cell* **177**, 1022-1034.e6 (2019).
- 180 18. Finan, C. *et al.* The druggable genome and support for target identification and validation in drug  
181 development. *Sci. Transl. Med.* **9**, (2017).
- 182 19. Ghousaini, M. *et al.* Open Targets Genetics: systematic identification of trait-associated genes using  
183 large-scale genetics and functional genomics. *Nucleic Acids Res.* **49**, D1311–D1320 (2021).
- 184 20. Moore, C. *et al.* The INTERVAL trial to determine whether intervals between blood donations can be  
185 safely and acceptably decreased to optimise blood supply: study protocol for a randomised controlled  
186 trial. *Trials* **15**, 363 (2014).
- 187 21. Di Angelantonio, E. *et al.* Efficiency and safety of varying the frequency of whole blood donation  
188 (INTERVAL): a randomised trial of 45 000 donors. *Lancet* **390**, 2360–2371 (2017).
- 189 22. Sun, B. B. *et al.* Genomic atlas of the human plasma proteome. *Nature* **558**, 73–79 (2018).
- 190 23. Jovanović, D., Krstivojević, P., Obradović, I., Durdević, V. & Dukanović, L. Serum cystatin C and  
191 beta2-microglobulin as markers of glomerular filtration rate. *Ren. Fail.* **25**, 123–133 (2003).
- 192 24. Sofat, R. *et al.* Circulating Apolipoprotein E Concentration and Cardiovascular Disease Risk: Meta-  
193 analysis of Results from Three Studies. *PLoS Med.* **13**, e1002146 (2016).

- 194 25. Rasmussen, K. L. Plasma levels of apolipoprotein E, APOE genotype and risk of dementia and  
195 ischemic heart disease: A review. *Atherosclerosis* **255**, 145–155 (2016).
- 196 26. van Poelje, P. D., Dang, Q. & Erion, M. D. Fructose-1,6-bisphosphatase as a therapeutic target for  
197 type 2 diabetes. *Drug Discov. Today Ther. Strateg.* **4**, 103–109 (2007).
- 198 27. Holmes, M. V. & Davey Smith, G. Can Mendelian Randomization Shift into Reverse Gear? *Clinical*  
199 *chemistry* vol. 65 363–366 (2019).
- 200 28. Imai, K., Keele, L., Tingley, D. & Yamamoto, T. Unpacking the Black Box of Causality: Learning  
201 about Causal Mechanisms from Experimental and Observational Studies. *Am. Polit. Sci. Rev.* **105**,  
202 765–789 (2011).
- 203 29. Davey Smith, G. & Hemani, G. Mendelian randomization: genetic anchors for causal inference in  
204 epidemiological studies. *Hum. Mol. Genet.* **23**, R89–98 (2014).
- 205 30. Wishart, D. S. *et al.* DrugBank 5.0: a major update to the DrugBank database for 2018. *Nucleic Acids*  
206 *Res.* **46**, D1074–D1082 (2018).
- 207 31. Knowler, W. C. *et al.* Reduction in the incidence of type 2 diabetes with lifestyle intervention or  
208 metformin. *N. Engl. J. Med.* **346**, 393–403 (2002).
- 209 32. Hunter, R. W. *et al.* Metformin reduces liver glucose production by inhibition of fructose-1-6-  
210 bisphosphatase. *Nat. Med.* **24**, 1395–1406 (2018).
- 211 33. Trainer, P. J. *et al.* Treatment of acromegaly with the growth hormone-receptor antagonist  
212 pegvisomant. *N. Engl. J. Med.* **342**, 1171–1177 (2000).
- 213 34. van der Lely, A. J. *et al.* Long-term treatment of acromegaly with pegvisomant, a growth hormone  
214 receptor antagonist. *Lancet* **358**, 1754–1759 (2001).
- 215 35. Paisley, A. N. *et al.* Pegvisomant interference in GH assays results in underestimation of GH levels.  
216 *Eur. J. Endocrinol.* **156**, 315–319 (2007).
- 217 36. Guevara-Aguirre, J. *et al.* Growth hormone receptor deficiency is associated with a major reduction in  
218 pro-aging signaling, cancer, and diabetes in humans. *Sci. Transl. Med.* **3**, 70ra13 (2011).

- 219 37. Ferrau, F., Albani, A., Ciresi, A., Giordano, C. & Cannavò, S. Diabetes Secondary to Acromegaly:  
220     Physiopathology, Clinical Features and Effects of Treatment. *Front. Endocrinol.* **9**, 358 (2018).
- 221 38. Rose, D. R. & Clemmons, D. R. Growth hormone receptor antagonist improves insulin resistance in  
222     acromegaly. *Growth Horm. IGF Res.* **12**, 418–424 (2002).
- 223 39. European Organization for Nuclear Research & OpenAIRE. Zenodo. (2013) doi:10.25495/7GXX-  
224     RD71.



## 225 Acknowledgements

226 Participants in the INTERVAL randomised controlled trial were recruited with the active collaboration of  
227 NHS Blood and Transplant England ([www.nhsbt.nhs.uk](http://www.nhsbt.nhs.uk)), which has supported field work and other  
228 elements of the trial. DNA extraction and genotyping was co-funded by the National Institute for Health  
229 Research (NIHR), the NIHR BioResource (<http://bioresource.nihr.ac.uk>) and the NIHR Cambridge  
230 Biomedical Research Centre (BRC-1215-20014). Olink® Proteomics assays were funded by Biogen, Inc.  
231 (Cambridge, MA, US). SomaLogic assays were funded by Merck and the NIHR Cambridge BRC (BRC-  
232 1215-20014). The academic coordinating centre for INTERVAL was supported by core funding from:  
233 NIHR Blood and Transplant Research Unit in Donor Health and Genomics (NIHR BTRU-2014-10024),  
234 UK Medical Research Council (MR/L003120/1), British Heart Foundation (SP/09/002; RG/13/13/30194;  
235 RG/18/13/33946) and the NIHR Cambridge BRC (BRC-1215-20014). A complete list of the investigators  
236 and contributors to the INTERVAL trial is provided in reference [21]. The academic coordinating centre  
237 would like to thank blood donor centre staff and blood donors for participating in the INTERVAL trial.

238 This work was supported by Health Data Research UK, which is funded by the UK Medical Research  
239 Council, Engineering and Physical Sciences Research Council, Economic and Social Research Council,  
240 Department of Health and Social Care (England), Chief Scientist Office of the Scottish Government Health  
241 and Social Care Directorates, Health and Social Care Research and Development Division (Welsh  
242 Government), Public Health Agency (Northern Ireland), British Heart Foundation and Wellcome. This  
243 study was also supported by the Victorian Government's Operational Infrastructure Support (OIS)  
244 program.

245 This work uses data provided by patients and collected by the NHS and Public Health England (PHE) as  
246 part of their care and support. Data on Hospital Episode Statistics, mortality and cancer registration was  
247 obtained from NHS Digital (data sharing agreement reference: DARS-NIC-156334-711SX).

248 S.C.R and J.M. were funded by the NIHR Cambridge BRC (BRC-1215-20014). S.A.L. is supported by a  
249 Canadian Institutes of Health Research postdoctoral fellowship (MFE-171279). G.A. was supported by a  
250 National Health and Medical Research Council of Australia (NHMRC) Early Career Fellowship (no.  
251 1090462). A.V.K. was supported by grants from the National Human Genome Research Institute (award  
252 numbers 1K08HG010155 and 5UM1HG008895), an institutional grant from the Broad Institute of MIT and  
253 Harvard (variant2function), and a Hassenfeld Scholar Award from Massachusetts General Hospital. J.D.  
254 holds a British Heart Foundation Personal Professorship and an NIHR Senior Investigator Award.

255 The funders had no role in study design, data collection and analysis, decision to publish, or preparation of  
256 the manuscript. The views expressed in this manuscript are those of the author(s) and not necessarily those  
257 of the NIHR or the Department of Health and Social Care.

## 258 **Data Availability**

259 With the exception of electronic hospital records, all data used in this study is publicly available or  
260 deposited in a public repository. Genetic data, proteomic data, and basic cohort characteristics for the  
261 INTERVAL cohort are available via the European Genotype-phenome Archive (EGA) with study  
262 accession EGAS00001002555 (<https://www.ebi.ac.uk/ega/studies/EGAS00001002555>). Dataset access is  
263 subject to approval by a Data Access Committee: these data are not publicly available as they contain  
264 potentially identifying and sensitive patient information. Linked electronic hospital records are currently  
265 only available to researchers at the University of Cambridge UK, however, may become more widely  
266 available in the future. Contact the data access committee for further details. All other data used in this  
267 study is publicly available without restriction. The PGS used in this study are available to download  
268 through the Polygenic Score Catalog (<https://www.pgscatalog.org/>) with accession numbers PGS000727  
269 (atrial fibrillation), PGS000018 (coronary artery disease), PGS000728 (chronic kidney disease),  
270 PGS000039 (ischaemic stroke), and PGS000729 (type 2 diabetes). GWAS summary statistics used to  
271 generate new PGS in this study are available to download through the GWAS Catalog  
272 (<https://www.ebi.ac.uk/gwas/>) with study accessions GCST008065 (chronic kidney disease), GCST007517  
273 (type 2 diabetes), and GCST006414 (atrial fibrillation). Summary statistics for all statistical tests are  
274 available in **Supplementary Data 3**. Full pQTL summary statistics published by Sun *et al.* 2018 for all  
275 SomaLogic SOMAscan aptamers are available to download from  
276 <https://www.phpc.cam.ac.uk/ceu/proteins/>. A listing of *cis*-pQTLs mapped for this study are provided in  
277 **Supplementary Data 4**. GWAS summary statistics used for Mendelian randomisation are available to  
278 download through the GWAS Catalog (<https://www.ebi.ac.uk/gwas/>) with study accessions  
279 GCGCST004787 (coronary artery disease), GCST008065 (chronic kidney disease), GCST006906  
280 (ischaemic stroke) and GCST007518 (type 2 diabetes). The DrugBank database is publicly available to  
281 download at <https://www.drugbank.ca/releases/latest>.

## 282 **Code Availability**

283 Code used to generate the results of this study, along with a detailed list of software and versions, are  
284 available on GitHub at [https://github.com/sritchie73/cardiometabolic\\_PGS\\_plasma\\_proteome/](https://github.com/sritchie73/cardiometabolic_PGS_plasma_proteome/) which is  
285 permanently archived by Zenodo<sup>39</sup> at doi: 10.5281/zenodo.4551565.

286 **Figures**

287 **Figure 1: Proteins associated with polygenic risk for cardiometabolic disease**

288

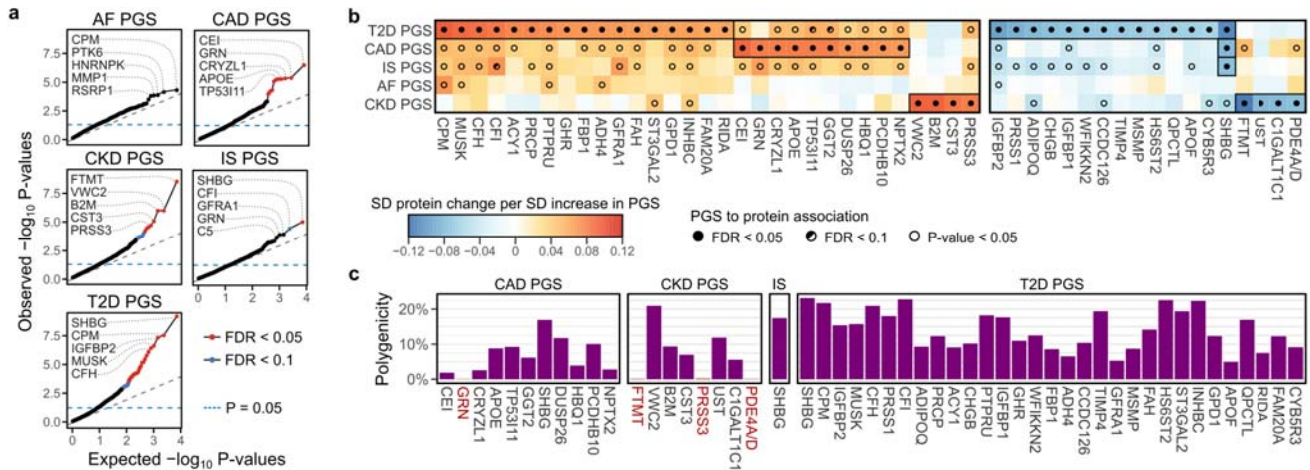

289

290 **a**) Quantile-quantile plots of P-values for PGS to protein associations across all 3,438 tested proteins. Each  
 291 plot compares the distribution of observed P-values (y-axes) to the distribution of expected P-values under  
 292 the null-hypothesis for 3,438 tests (x-axes) on a  $-\log_{10}$  scale. Associations were adjusted for age, sex, 10  
 293 genotype PCs, sample measurement batch, and time between blood draw and sample processing. Full  
 294 summary statistics are provided in **Supplementary Data 3a**. **b**) Heatmaps showing the 49 proteins whose  
 295 levels significantly associated (FDR < 0.05) with at least one PGS. Each heatmap cell shows the standard  
 296 deviation change in protein levels per standard deviation increase in PGS, estimated linear regression  
 297 adjusted for age, sex, 10 genotype PCs, sample measurement batch, and time between blood draw and  
 298 sample processing. Proteins are ordered by PGS from left to right by decreasing association magnitude,  
 299 positive and negative associations split into separate heatmaps. Point estimates are detailed in **Extended**  
 300 **Data Table 2**. Details about each protein are provided in **Extended Data Table 3**. **c**) Barplots showing the  
 301 proportion of the genome required to explain each PGS to protein association (polygenicity; **Online**  
 302 **Methods**). Proteins are ordered from left to right by strength of PGS to protein association. Highlighted in  
 303 red are PGS to protein associations that were explained by singular variants regulating the protein levels,  
 304 protein quantitative trait loci (pQTLs), rather than polygenic.

305 **Figure 2: PGS-associated proteins influence 7.7 year risk of myocardial infarction and diabetes**

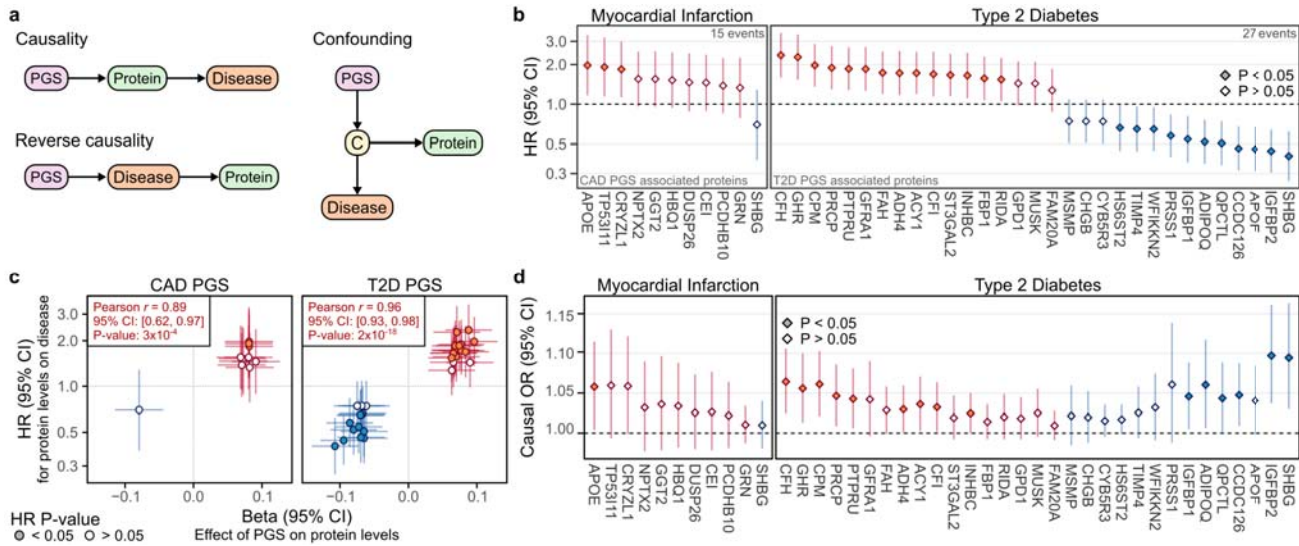

306

307 **a)** Possible models of causality for PGS to protein to disease associations. C: causal disease factor upstream  
 308 of protein that induces a correlation between protein levels and disease. **b)** Association between PGS-  
 309 associated proteins with 7.7 year risk of hospitalisation with myocardial infarction and diabetes. There were  
 310 insufficient events to analyse proteins associated with the IS PGS (N=3 incident disease events) or with the  
 311 CKD PGS (N=0 incident disease events) (**Extended Data Fig. 4a**). Cox proportional hazard models were  
 312 fit between protein levels and incident disease using follow-up as time scale and adjusting for age and sex  
 313 (**Online Methods**). HR: hazard ratio conferred per standard deviation increase in protein levels. 95% CI:  
 314 95% confidence interval. See **Extended Data Table 2** for detailed point estimates. **c)** Comparison of  
 315 effects of PGS on protein levels (x-axes; **Fig. 1b**) to associations between protein levels and incident  
 316 disease (y-axes; **Fig. 2b**). Points and horizontal bars on the x-axes indicate standard deviation change in  
 317 protein levels (and 95% confidence interval) per standard deviation increase in respective PGS. Points and  
 318 vertical bars on the y-axis show hazard ratio (and 95% confidence interval) per standard deviation increase  
 319 in protein levels. **d)** Estimated causal effect of PGS on disease through each protein in mediation analysis  
 320 (**Online Methods**). Causal OR: odds ratio for incident disease adjusting for age and sex conferred through  
 321 each protein per standard deviation increase in PGS. The total odds ratio for MI conferred per standard  
 322 deviation increase in CAD PGS was 2.94 (95% CI: 1.69–5.31, P-value:  $2 \times 10^{-4}$ ). The total odds ratio for  
 323 T2D conferred per standard deviation increase T2D PGS was 2.00 (95% CI: 1.37–2.96, P-value:  $4 \times 10^{-4}$ ).  
 324 Proteins are ordered from left to right by their hazard ratio in **Fig. 1b. b-d**) points in red indicate proteins  
 325 whose levels increased with PGS, and blue indicates proteins whose levels decreased with PGS.

## 326 Tables

327 **Table 1: Drugs whose effects on proteins counteract effects of PGSs on proteins**

328

| Drug ID | Drug Name           | Therapeutic uses                         | Protein        | PGS associated target  |          |              | PGS supported use |                            |
|---------|---------------------|------------------------------------------|----------------|------------------------|----------|--------------|-------------------|----------------------------|
|         |                     |                                          |                | Drug Effect            | Pharma   | Disease      | Phase             | Trial Number               |
| DB00331 | Metformin           | Type 2 diabetes                          | FBP1<br>GPD1   | Inhibitor<br>Inhibitor | Yes<br>- | T2D<br>CAD   | Licensed<br>4     | -<br>NCT00361075           |
| DB00396 | Progesterone        | Female infertility, hormone imbalance    | SHBG           | Potentiator            | -        | T2D*<br>IS   | 3<br>-            | NCT00000466<br>-           |
| DB01088 | Iloprost            | Pulmonary arterial hypertension          | PDE4A<br>PDE4D | Inducer<br>Inducer     | -<br>-   | CKD<br>CAD   | 3<br>3            | NCT00345501<br>NCT00000529 |
| DB00675 | Tamoxifen           | Breast, ovarian, and endometrial cancers | SHBG           | Inducer                | -        | IS<br>T2D*   | -<br>-            | -<br>-                     |
| DB00082 | Pegvisomant         | Acromegaly                               | GHR            | Antagonist             | Yes      | T2D*<br>T2D* | 2<br>2            | NCT02023918<br>NCT00494663 |
| DB01026 | Ketoconazole        | Fungal infections, Cushing's syndrome    | SHBG           | Ligand                 | -        | CAD<br>IS    | -<br>-            | -<br>-                     |
| DB12010 | Fostamatinib        | Immune thrombocytopenic purpura          | MUSK           | Inhibitor              | -        | T2D          | -                 | -                          |
| DB00131 | Adenosine phosphate | Nutritional deficiencies                 | FBP1           | Antagonist             | -        | T2D          | -                 | -                          |
| DB14533 | Zinc chloride       | Zinc deficiency, intravenous nutrition   | APOE           | Antagonist             | -        | CAD*         | -                 | -                          |
| DB14548 | Zinc sulfate        | Intravenous nutrition                    | APOE           | Antagonist             | -        | CAD*         | -                 | -                          |

329

330 List of drugs that reduce the function or levels of proteins whose levels are elevated in participants with  
331 high polygenic risk, or increase in function or levels of proteins whose levels are decreased in participants  
332 with high polygenic risk (**Supplementary Information**). Drug ID gives the identifier in DrugBank.  
333 Columns under the “PGS associated target” heading indicate the PGS-associated protein that interacts with  
334 the drug, and the effect of the drug on the listed protein, and “Yes” in the “Pharma” when the  
335 pharmacological action of the drug is due to its effect on the protein (as listed in the DrugBank database).  
336 Columns under the “PGS supported use” heading indicate the disease(s) whose PGS are associated with the  
337 listed protein, and where clinical trials for that drug on that disease have been undertaken, the maximum  
338 clinical trial phase reached along with the respective trial number in the National Institute of Health  
339 (NIH)’s National Library of Medicine (NLM)’s Clinical Trials database (<https://clinicaltrials.gov>). A \* next  
340 to the disease indicates there was evidence supporting a causal effect of the protein on the disease (**Fig. 2d**).  
341 See **Supplementary Information** for summary of evidence for each drug.

## 342 **Online Methods**

### 343 ***INTERVAL cohort***

344 INTERVAL is a cohort of approximately 50,000 participants nested within a randomised trial studying the  
345 safety of varying frequency of blood donation<sup>20,21</sup>. Participants were blood donors aged 18 years and older  
346 (median 44 years of age; 49% women) recruited between June 2012 and June 2014 from 25 centres across  
347 England. The collection of their blood samples for research purposes was done using standard protocols  
348 and has been extensively described previously<sup>20</sup>. Participants gave informed consent and this study was  
349 approved by the National Research Ethics Service (11/EE/0538).

350 Electronic health records were obtained for all INTERVAL participants from the National Health Service  
351 (NHS) hospital episode statistics database ([https://digital.nhs.uk/data-and-information/data-tools-and-](https://digital.nhs.uk/data-and-information/data-tools-and-services/data-services/hospital-episode-statistics)  
352 [services/data-services/hospital-episode-statistics](https://digital.nhs.uk/data-and-information/data-tools-and-services/data-services/hospital-episode-statistics)) for all events up to the 8<sup>th</sup> of February 2020, prior to the  
353 onset of the COVID19 pandemic in England. The median and maximum follow-up time were 6.9 years and  
354 7.7 years respectively. The earliest available hospital record for any INTERVAL participant was the 25<sup>th</sup>  
355 March 1999, with maximum retrospective follow-up of 13.6 years. These records came in the form of  
356 international classification of diseases 10<sup>th</sup> revision (ICD-10) codes<sup>40</sup> and were subsequently made available  
357 to analysts after summarisation into 301 endpoints using CALIBER rule-based phenotyping algorithms<sup>41</sup>  
358 (<https://www.caliberresearch.org/portal>). ICD-10 codes contributed to each event regardless of whether  
359 they coded for primary or non-primary diagnoses in the hospital records.

360 Genotyping, quality control, and imputation of INTERVAL participants has been described in detail  
361 previously<sup>42</sup>. Briefly, participants were genotyped using the Affymetrix UK Biobank Axiom array in 10  
362 batches. Samples were removed if they had sex mismatch, extreme heterozygosity, were of non-European  
363 descent, or were duplicate samples. Related samples were removed by excluding one sample from each pair  
364 of close relatives (first or second degree; identity-by-descent  $\hat{\pi} > 0.187$ ). Genotyped variants were  
365 removed if they were monomorphic, bi-allelic and had Hardy-Weinberg equilibrium p-value  $< 5 \times 10^{-6}$ , or  
366 call rate  $< 99\%$ . SHAPEIT3 was used to phase variants, then imputation to the UK10K/1000 Genomes  
367 panel was performed using the Sanger Imputation Server (<https://imputation.sanger.ac.uk>).

368 Quantification, processing, and quality control of protein levels in INTERVAL using the SOMAscan  
369 assays has been described in detail previously<sup>22</sup>. Briefly, relative concentrations of 4,034 SOMAscan  
370 aptamers were measured in 3,562 INTERVAL participants in two batches by SomaLogic Inc. (Boulder  
371 Colorado, US) using version 3 of the SOMAscan platform. Aptamers were excluded if, in the latest version  
372 of the SOMAscan platform, they (1) targeted non-human proteins, (2) have been found to be measuring the  
373 fusion construct rather than the target protein, or (3) found to be measuring a contaminant. A curated  
374 information sheet for all 4,034 aptamers is provided in **Supplementary Data 1**.

375 Aptamer concentrations (relative fluorescence units) were natural log transformed then adjusted within  
376 each batch for participant age, sex, the first three genetic PCs, and duration between blood draw and sample  
377 processing ( $< 1$  day or  $> 1$  day), then the residuals were inverse rank normal transformed. Here, we further  
378 adjusted the normalized protein levels used in previous studies for batch number, and filtered to 3,793 high  
379 quality aptamers targeting 3,438 proteins after obtaining the latest information about aptamer sensitivity  
380 and specificity from SomaLogic. Distributions of aptamer levels and associations with covariates before  
381 and after quality control are given in **Supplementary Data 2**.

382 In total, there were 3,087 INTERVAL participants passing quality control, without prevalent  
383 cardiometabolic disease (see below), and with matched genotype, proteomic, and electronic health record  
384 data available for the primary analyses.

### 385 *Prevalent disease exclusion*

386 National Health Service (NHS) Blood and Transplant blood donation eligibility criteria  
387 (<https://www.blood.co.uk/who-can-give-blood/>) meant there were built in exclusions for the INTERVAL  
388 cohort for people with a history of major diseases, recent illness, or infection. Specifically for  
389 cardiometabolic diseases, blood donation eligibility criteria excluded individuals who had been diagnosed  
390 with atrial fibrillation, had a history of any stroke, or a history of major heart disease; including heart  
391 failure, coronary thrombosis, myocardial infarction, cardiomyopathy, ischaemic heart disease, and  
392 arrhythmia, or surgery for a non-congenital heart conditions. Use of aspirin or other blood thinners to  
393 control elevated blood pressure (hypertension) also made people ineligible to donate blood and participate  
394 in the INTERVAL cohort. Individuals with type 2 diabetes were ineligible, unless their type 2 diabetes was  
395 well controlled by diet alone, did not require regular insulin treatment, and the individual had not required  
396 insulin treatment for at least four weeks prior to attempted blood donation. Extended details on blood  
397 donation criteria eligibility for specific diseases, medications, and lifestyle factors can be found at  
398 <https://my.blood.co.uk/knowledgebase>.

399 In addition to intrinsic exclusion due to blood donation eligibility criteria, participants were excluded from  
400 analyses if they had any events relating to cardiometabolic disease prior to baseline assessment. Among the  
401 301 CALIBER endpoints, we classified 48 as cardiometabolic disease or having potential to introduce  
402 reverse causality by modifying risk for incident AF, CAD, CKD, IS, or T2D (**Supplementary Table 1**). In  
403 total 87 participants (2.7%) were excluded, predominantly due to prevalent hypertension (N=57 events;  
404 66% of excluded participants) and prevalent diabetes (N=11 events; 13% of excluded participants); with all  
405 others accounting for less than 5% of excluded participants (**Supplementary Table 1**).

### 406 *Polygenic scores*

407 PGSs were derived in a consistent manner, by linkage-disequilibrium thinning, at an  $r^2$  threshold of 0.9, the  
408 latest GWAS summary statistics for each respective disease (**Supplementary Information**). GWAS  
409 summary statistics used to derive the AF PGS, CKD PGS, and T2D PGS were those published by Nielsen  
410 *et al.* in 2018<sup>9</sup> (GCST006414), Wuttke *et al.* in 2019<sup>10</sup> (GCST008065), and Mahajan *et al.* in 2018<sup>11</sup>  
411 (GCST007517), respectively. PGSs for CAD and IS used in this study were our previously published CAD  
412 metaGRS<sup>43</sup> and Stroke metaGRS<sup>44</sup>. The CAD PGS was derived from meta-analysis of three PGSs for  
413 CAD, including a PGS derived as described above from GWAS summary statistics published by Nikpay *et*  
414 *al.* in 2015<sup>45</sup>. The IS PGS was derived from meta-analysis of PGS for ischaemic stroke and its risk factors,  
415 including a PGS derived as described above from GWAS summary statistics for IS published by Malik *et*  
416 *al.* in 2018<sup>12</sup>. The PGSs each comprised 1.75–3.23 million SNPs genome-wide and are available to  
417 download through the Polygenic Score Catalog<sup>46</sup> (<https://www.pgscatalog.org/>) with accession numbers  
418 PGS000727 (atrial fibrillation), PGS000018 (coronary artery disease), PGS000728 (chronic kidney  
419 disease), PGS000039 (ischaemic stroke), and PGS000729 (type 2 diabetes). All PGSs were derived from  
420 GWAS summary statistics including only individuals with European ancestry. See **Supporting**  
421 **Information and Extended Data Fig. 4** for details on PGS validation.

422 Levels of each PGS (sum of dosages  $\times$  weights) were computed in INTERVAL from probabilistic dosage  
423 data using plink (version 2)<sup>47</sup> after mapping PGS variants to those available in the INTERVAL genotype

424 data (**Supplementary Information**). Levels of each PGS were adjusted for the first 10 principal  
425 components (PCs) of the imputed genotype data and standardised to have mean of 0 and standard deviation  
426 of 1 prior to downstream statistical analyses.

#### 427 *PGS to protein associations*

428 Each of the five PGSs were tested for association with each of the 3,793 aptamers using linear regression  
429 (**Fig 1a,b, Extended Data Table 2**). PGS and proteins were adjusted for covariates and normalised prior to  
430 model fitting (see above). Linear regression coefficients were averaged where multiple high quality  
431 aptamers targeted the same protein (**Supplementary Information**). False discovery rate (FDR) correction  
432 was subsequently applied across the 3,438 P-values (one per protein) for each PGS separately. Details on  
433 aptamer specificity and sensitivity are given in **Supplementary Table 2** for the 54 aptamers targeting the  
434 49 PGS-associated proteins, and aptamer specific estimates of PGS on protein levels are detailed in  
435 **Supplementary Table 3** for the five PGS-associated proteins targeted by more than one aptamer  
436 (WFIKKN2, GPD1, IGFBP1, IGFBP2, and SHBG).

#### 437 *Polygenicity of PGS to protein associations*

438 To quantify the polygenicity of PGS to protein associations (**Fig. 1c, Extended Data Fig. 3**) we performed  
439 a multi-step experiment to determine the proportion of the genome required to explain that association.  
440 First, we split the given PGS into separate scores for each of the 1,703 approximately independent LD  
441 blocks estimated in Europeans from the 1000 Genomes reference panel by Berisa & Pickrell 2016<sup>48</sup>  
442 ([https://bitbucket.org/nygresearch/ldetect-data/src/master/EUR/fourier\\_ls-all.bed](https://bitbucket.org/nygresearch/ldetect-data/src/master/EUR/fourier_ls-all.bed)). Next, we tested each of  
443 these 1,703 scores for association with the given protein (**Supplementary Data 3e**). Then, we retested the  
444 PGS to protein association, progressively removing independent LD blocks, at each step removing the LD  
445 block whose score had the strongest association with the protein. From this we quantified the polygenicity  
446 (**Fig. 1c**) based on the LD blocks needed to be removed from the given PGS in order to attenuate the PGS  
447 to protein association (so that the association P-value became  $> 0.05$ , **Supplementary Data 3f**) as the sum  
448 of removed LD block sizes / sum of all LD block sizes (*i.e.* proportion of genome removed). **Extended**  
449 **Data Fig. 3** shows the independent LD blocks contributing to the polygenicity of each PGS to protein  
450 association.

#### 451 *Independent contributions of PGS and pQTLs to protein levels*

452 Multivariable linear regression models were fit for each protein on PGS levels and pQTL dosages to  
453 estimate their independent contributions to protein levels (**Supplementary Table 4**). The pQTLs used for  
454 each protein were: (1) conditionally independent pQTLs mapped in INTERVAL and published by Sun *et*  
455 *al.* 2018<sup>22</sup>, which included both *cis* (within 1Mb of the encoding gene) and *trans* pQTLs passing the *trans*-  
456 significance threshold of  $P < 1.5 \times 10^{-11}$ ; (2) *trans*-pQTLs with  $P < 1.5 \times 10^{-11}$  (lead variant only) for proteins  
457 not published in Sun *et al.* 2018<sup>22</sup> (B2M, DUSP26, and FTMT); and (3) hierarchically significant *cis*-  
458 pQTLs (lead variant only) mapped in this study (**Supplementary Data 4, Supplementary Information**)  
459 for proteins without *cis*-pQTLs passing the *trans*-pQTL significance threshold above (ACY1, ADIPOQ,  
460 APOE, CST3, GPD1, PTPRU, SHBG, and UST).

#### 461 *Incident disease associations*

462 PGSs and protein levels were tested for association with incident disease using Cox proportional hazards  
463 models adjusting for age and sex (**Fig. 2b, Extended Data Fig. 4**) using the survival package in R. The  
464 timescale used was time from baseline to first event of the relevant disease or to the latest available date in  
465 the hospital records (8<sup>th</sup> February 2020). PGSs and proteins were adjusted for covariates and normalised



466 prior to model fitting (see above). Cox model coefficients were averaged where multiple high quality  
467 aptamers targeted the same protein (**Supplementary Information**).

468 Incident disease events for AF, CAD, CKD, IS, and T2D were defined as first hospital episode for the  
469 closest matching CALIBER phenotype<sup>41</sup> (<https://www.caliberresearch.org/portal>). Incident AF events were  
470 defined as any hospital episode with ICD-10 code I48. Incident IS events were defined as any hospital  
471 episode with ICD-10 codes I63 or I69.3. For CAD we analysed incident MI events, defined as any hospital  
472 episode with ICD-10 codes I21–I23, I24.1, or I25.2. The closest matching CALIBER phenotype for T2D  
473 was for diabetes more broadly, including ICD-10 codes for any hospital episode for type 1 or type 2  
474 diabetes or complications thereof: E10–E14, G59.0, G63.2, H28.0, H36.0, M14.2, N08.3, or O24.0–O24.3,  
475 however we note type 1 diabetics are not eligible to donate blood (<https://my.blood.co.uk/knowledgebase/>)  
476 and adult onset of type 1 diabetes is relatively rare compared to type 2 diabetes<sup>49</sup>. closest matching  
477 CALIBER phenotype for CKD was for end stage renal disease more broadly, which as defined as any  
478 hospital episode with ICD-10 codes N16.5, N18.5, T82.4, T86.1, Y60.2, Y61.2, Y84.1, Z49.1, Z49.2,  
479 Z94.0, and Z99.2.

#### 480 **Mediation analysis**

481 Mediation analysis was used to identify causal proteins by identifying the PGS-associated proteins which  
482 partially mediate the association of PGS on disease (**Fig. 2d**). This approach uses the counterfactual  
483 framework to infer causal effects<sup>28,50,51</sup> and can be adapted to this setting as the arrow of causality between  
484 PGS and any associated phenotype can only flow in one direction as the PGS is fixed at conception (i.e. the  
485 underlying alleles in each person cannot be modified later in life by protein levels or the development of  
486 cardiometabolic disease). Here, we used the natural effects model developed by Vansteelandt *et al.* 2012<sup>52</sup>,  
487 which is available in the medflex R package<sup>53</sup>, to estimate natural indirect effects (effects of PGS on  
488 disease through protein levels) on the log odds scale by imputing unobserved counterfactuals. Standard  
489 errors were computed using the robust sandwich estimator<sup>54</sup>, from which 95% confidence intervals and P-  
490 values were calculated. Multiple mediation analysis<sup>55</sup> was performed using the R package mma<sup>56</sup> to  
491 quantify the proportion of PGS to disease association mediated by the 15 causal T2D proteins.

#### 492 **Mendelian randomisation**

493 Two-sample Mendelian randomisation<sup>29</sup> was also performed as an orthogonal approach to identify proteins  
494 which may play a causal role in disease (**Extended Data Fig. 5, Supplementary Table 5,6**). PGS-  
495 associated proteins were tested provided they had three or more independent by LD ( $r^2 < 0.1$ ) *cis*-pQTLs  
496 after mapping pQTL to GWAS summary statistics (**Supplementary Information**), and provided the  
497 SomaLogic aptamer(s) did not have similar affinity for or comparable binding to multiple proteins or  
498 differential binding to specific isoforms (**Supporting Table 3, Supplementary Information**). In total, 12  
499 of the 49 PGS-associated proteins could be tested (24%), substantially higher than the overall measured  
500 proteome (497 proteins, 14.5%). GWAS summary statistics were obtained from Nelson *et al.* 2017<sup>13</sup> for  
501 coronary artery disease (GCST004787), Wuttke *et al.* 2019<sup>10</sup> for chronic kidney disease (GCST008065),  
502 Malik *et al.* 2018<sup>12</sup> for ischaemic stroke (GCST006906) and Mahajan *et al.* 2018<sup>11</sup> for type 2 diabetes  
503 (GCST007518). In all cases, we used the GWAS summary statistics for the samples of recent European  
504 ancestry. For type 2 diabetes, we used the BMI-adjusted GWAS summary statistics in order to avoid false  
505 positive causal estimates arising where pQTLs influence type 2 diabetes risk through BMI rather than  
506 through the tested protein (horizontal pleiotropy). We used five different Mendelian Randomisation  
507 methods<sup>57–60</sup>, each of which make use of information across 3 or more instruments to estimate causal

508 effects with each method differentially robust to different sources of bias, to obtain a consensus (median)  
509 estimate of causal effects of protein levels on disease risk (**Supporting Information**). We considered there  
510 to be a significant causal effect where  $P < 0.05$  along with no significant evidence that causal effects were  
511 due to associations of the pQTLs with some other causal risk factor (horizontal pleiotropy; Egger  
512 intercept<sup>60</sup>  $P > 0.05$ ). FDR correction was performed across all tested proteins for each disease separately.  
513 Analysis was performed using the R package MendelianRandomization<sup>61</sup>. Colocalisation analysis<sup>62</sup> was  
514 also performed where *cis*-pQTL instruments had  $P < 1 \times 10^{-6}$  in the respective GWAS (**Supplementary**  
515 **Table 6, Supplementary Information**).

#### 516 *Drug targets*

517 For each PGS-associated protein, a list of drugs that target or interact with the protein was downloaded  
518 from the DrugBank database<sup>30</sup> version 5.17 released on the 2<sup>nd</sup> of July 2020  
519 (<https://go.drugbank.com/releases/latest>) (**Extended Data Table 5, Supplementary Table 7**). To obtain a  
520 list of drugs that counteract PGS effects and thus may have potential repurposing opportunities (**Table 1**),  
521 we filtered to drugs with approved status and not withdrawn status, then to drugs whose effect on the  
522 protein was in the opposite direction to the effect of the PGS on protein levels (e.g. inhibitors where  
523 increased PGS was associated with increased protein levels, **Supplementary Information**).

## 524 **References**

- 525 40. World Health Organization. *International Statistical Classification of Diseases and Related Health*  
526 *Problems: Instruction manual*. (World Health Organization, 2004).
- 527 41. Kuan, V. *et al.* A chronological map of 308 physical and mental health conditions from 4 million  
528 individuals in the English National Health Service. *Lancet Digit Health* **1**, e63–e77 (2019).
- 529 42. Astle, W. J. *et al.* The Allelic Landscape of Human Blood Cell Trait Variation and Links to Common  
530 Complex Disease. *Cell* **167**, 1415–1429.e19 (2016).
- 531 43. Inouye, M. *et al.* Genomic Risk Prediction of Coronary Artery Disease in 480,000 Adults:  
532 Implications for Primary Prevention. *J. Am. Coll. Cardiol.* **72**, 1883–1893 (2018).
- 533 44. Abraham, G. *et al.* Genomic risk score offers predictive performance comparable to clinical risk  
534 factors for ischaemic stroke. *Nat. Commun.* **10**, 5819 (2019).
- 535 45. Nikpay, M. *et al.* A comprehensive 1,000 Genomes-based genome-wide association meta-analysis of  
536 coronary artery disease. *Nat. Genet.* **47**, 1121–1130 (2015).
- 537 46. Lambert, S. A. *et al.* The Polygenic Score Catalog: an open database for reproducibility and  
538 systematic evaluation. *Nat. Genet.* **accepted**, (2021).
- 539 47. Chang, C. C. *et al.* Second-generation PLINK: rising to the challenge of larger and richer datasets.  
540 *Gigascience* **4**, 7 (2015).
- 541 48. Berisa, T. & Pickrell, J. K. Approximately independent linkage disequilibrium blocks in human  
542 populations. *Bioinformatics* **32**, 283–285 (2016).
- 543 49. Atkinson, M. A., Eisenbarth, G. S. & Michels, A. W. Type 1 diabetes. *Lancet* **383**, 69–82 (2014).
- 544 50. Holland, P. W. Statistics and Causal Inference. *J. Am. Stat. Assoc.* **81**, 945–960 (1986).
- 545 51. Imai, K., Keele, L. & Tingley, D. A general approach to causal mediation analysis. *Psychol. Methods*  
546 **15**, 309–334 (2010).
- 547 52. Vansteelandt, S., Bekaert, M. & Lange, T. Imputation strategies for the estimation of natural direct and  
548 indirect effects. *Epidemiol. Method.* **1**, 131–158 (2012).

- 549 53. Steen, J., Loeys, T., Moerkerke, B. & Vansteelandt, S. medflex : an R package for flexible mediation  
550 analysis using natural effect models. *J. Stat. Softw.* **76**, (2017).
- 551 54. Liang, K.-Y. & Zeger, S. L. Longitudinal data analysis using generalized linear models. *Biometrika*  
552 **73**, 13–22 (1986).
- 553 55. Yu, Q., Fan, Y. & Wu, X. General multiple mediation analysis with an application to explore racial  
554 disparities in breast cancer survival. *J. Biom. Biostat.* **5**, 1–9 (2014).
- 555 56. Yu, Q. & Li, B. mma: an R package for mediation analysis with multiple mediators. *Journal of Open*  
556 *Research Software* **5**, (2017).
- 557 57. Burgess, S., Butterworth, A. & Thompson, S. G. Mendelian randomization analysis with multiple  
558 genetic variants using summarized data. *Genet. Epidemiol.* **37**, 658–665 (2013).
- 559 58. Bowden, J., Davey Smith, G., Haycock, P. C. & Burgess, S. Consistent Estimation in Mendelian  
560 Randomization with Some Invalid Instruments Using a Weighted Median Estimator. *Genet.*  
561 *Epidemiol.* **40**, 304–314 (2016).
- 562 59. Hartwig, F. P., Davey Smith, G. & Bowden, J. Robust inference in summary data Mendelian  
563 randomization via the zero modal pleiotropy assumption. *Int. J. Epidemiol.* **46**, 1985–1998 (2017).
- 564 60. Bowden, J., Davey Smith, G. & Burgess, S. Mendelian randomization with invalid instruments: effect  
565 estimation and bias detection through Egger regression. *Int. J. Epidemiol.* **44**, 512–525 (2015).
- 566 61. Yavorska, O. O. & Burgess, S. MendelianRandomization: an R package for performing Mendelian  
567 randomization analyses using summarized data. *Int. J. Epidemiol.* **46**, 1734–1739 (2017).
- 568 62. Giambartolomei, C. *et al.* Bayesian test for colocalisation between pairs of genetic association studies  
569 using summary statistics. *PLoS Genet.* **10**, e1004383 (2014).
- 570 63. Nikpay Majid, Soubeyrand Sebastien, Tahmasbi Rasool & McPherson Ruth. Multiomics Screening  
571 Identifies Molecular Biomarkers Causally Associated With the Risk of Coronary Artery Disease.  
572 *Circulation: Genomic and Precision Medicine* **13**, e002876 (2020).

- 573 64. Ruttman, E. *et al.* Gamma-glutamyltransferase as a risk factor for cardiovascular disease mortality:  
574 an epidemiological investigation in a cohort of 163,944 Austrian adults. *Circulation* **112**, 2130–2137  
575 (2005).
- 576 65. Lee, D. S. *et al.* Gamma glutamyl transferase and metabolic syndrome, cardiovascular disease, and  
577 mortality risk: the Framingham Heart Study. *Arterioscler. Thromb. Vasc. Biol.* **27**, 127–133 (2007).
- 578 66. Kojima, Y. *et al.* Progranulin expression in advanced human atherosclerotic plaque. *Atherosclerosis*  
579 **206**, 102–108 (2009).
- 580 67. Pugeat, M. *et al.* Interrelations between sex hormone-binding globulin (SHBG), plasma lipoproteins  
581 and cardiovascular risk. *J. Steroid Biochem. Mol. Biol.* **53**, 567–572 (1995).
- 582 68. Sutton-Tyrrell, K. *et al.* Sex-hormone-binding globulin and the free androgen index are related to  
583 cardiovascular risk factors in multiethnic premenopausal and perimenopausal women enrolled in the  
584 Study of Women Across the Nation (SWAN). *Circulation* **111**, 1242–1249 (2005).
- 585 69. Liu, P. Y., Death, A. K. & Handelsman, D. J. Androgens and cardiovascular disease. *Endocr. Rev.* **24**,  
586 313–340 (2003).
- 587 70. Li, G.-S. *et al.* Do the mutations of C1GALT1C1 gene play important roles in the genetic  
588 susceptibility to Chinese IgA nephropathy? *BMC Med. Genet.* **10**, 101 (2009).
- 589 71. Yoshida, T. *et al.* Association of gene polymorphisms with chronic kidney disease in high- or low-risk  
590 subjects defined by conventional risk factors. *Int. J. Mol. Med.* **23**, 785–792 (2009).
- 591 72. Foster, M. C., Yang, Q., Hwang, S.-J., Hoffmann, U. & Fox, C. S. Heritability and genome-wide  
592 association analysis of renal sinus fat accumulation in the Framingham Heart Study. *BMC Med. Genet.*  
593 **12**, 148 (2011).
- 594 73. Madsen Tracy E. *et al.* Circulating SHBG (Sex Hormone-Binding Globulin) and Risk of Ischemic  
595 Stroke. *Stroke* **51**, 1257–1264 (2020).

- 596 74. Baumeier, C. *et al.* Caloric restriction and intermittent fasting alter hepatic lipid droplet proteome and  
597 diacylglycerol species and prevent diabetes in NZO mice. *Biochim. Biophys. Acta* **1851**, 566–576  
598 (2015).
- 599 75. Ngo, D. *et al.* Proteomic profiling reveals novel biomarkers and pathways in type 2 diabetes risk. *JCI*  
600 *Insight* (2021) doi:10.1172/jci.insight.144392.
- 601 76. Spranger, J. *et al.* Adiponectin and protection against type 2 diabetes mellitus. *Lancet* **361**, 226–228  
602 (2003).
- 603 77. Gudmundsdottir, V. *et al.* Circulating Protein Signatures and Causal Candidates for Type 2 Diabetes.  
604 *Diabetes* **69**, 1843–1853 (2020).
- 605 78. Lau, W., Andrew, T. & Maniatis, N. High-Resolution Genetic Maps Identify Multiple Type 2  
606 Diabetes Loci at Regulatory Hotspots in African Americans and Europeans. *Am. J. Hum. Genet.* **100**,  
607 803–816 (2017).
- 608 79. Suckale, J. & Solimena, M. The insulin secretory granule as a signaling hub. *Trends Endocrinol.*  
609 *Metab.* **21**, 599–609 (2010).
- 610 80. Kim-Muller, J. Y. *et al.* Aldehyde dehydrogenase 1a3 defines a subset of failing pancreatic  $\beta$  cells in  
611 diabetic mice. *Nat. Commun.* **7**, 12631 (2016).
- 612 81. Voight, B. F. *et al.* Twelve type 2 diabetes susceptibility loci identified through large-scale association  
613 analysis. *Nat. Genet.* **42**, 579–589 (2010).
- 614 82. Rajwani, A. *et al.* Increasing circulating IGFBP1 levels improves insulin sensitivity, promotes nitric  
615 oxide production, lowers blood pressure, and protects against atherosclerosis. *Diabetes* **61**, 915–924  
616 (2012).
- 617 83. Xu, S., Lind, L., Zhao, L., Lindahl, B. & Venge, P. Plasma prolylcarboxypeptidase (angiotensinase C)  
618 is increased in obesity and diabetes mellitus and related to cardiovascular dysfunction. *Clin. Chem.* **58**,  
619 1110–1115 (2012).

- 620 84. Morris, A. P. *et al.* Large-scale association analysis provides insights into the genetic architecture and  
621 pathophysiology of type 2 diabetes. *Nat. Genet.* **44**, 981–990 (2012).
- 622 85. Grarup, N., Sandholt, C. H., Hansen, T. & Pedersen, O. Genetic susceptibility to type 2 diabetes and  
623 obesity: from genome-wide association studies to rare variants and beyond. *Diabetologia* **57**, 1528–  
624 1541 (2014).
- 625 86. Dwinovan, J., Colella, A. D., Chegeni, N., Chataway, T. K. & Sokoya, E. M. Proteomic analysis  
626 reveals downregulation of housekeeping proteins in the diabetic vascular proteome. *Acta Diabetol.* **54**,  
627 171–190 (2017).
- 628 87. Ding, E. L. *et al.* Sex hormone-binding globulin and risk of type 2 diabetes in women and men. *N.*  
629 *Engl. J. Med.* **361**, 1152–1163 (2009).
- 630 88. Lopez, P. H. *et al.* Mice lacking sialyltransferase ST3Gal-II develop late-onset obesity and insulin  
631 resistance. *Glycobiology* **27**, 129–139 (2017).
- 632 89. Kato, N. Insights into the genetic basis of type 2 diabetes. *J. Diabetes Investig.* **4**, 233–244 (2013).

## 633 Extended Data

### 634 Extended Data Figure 1: Study schematic.

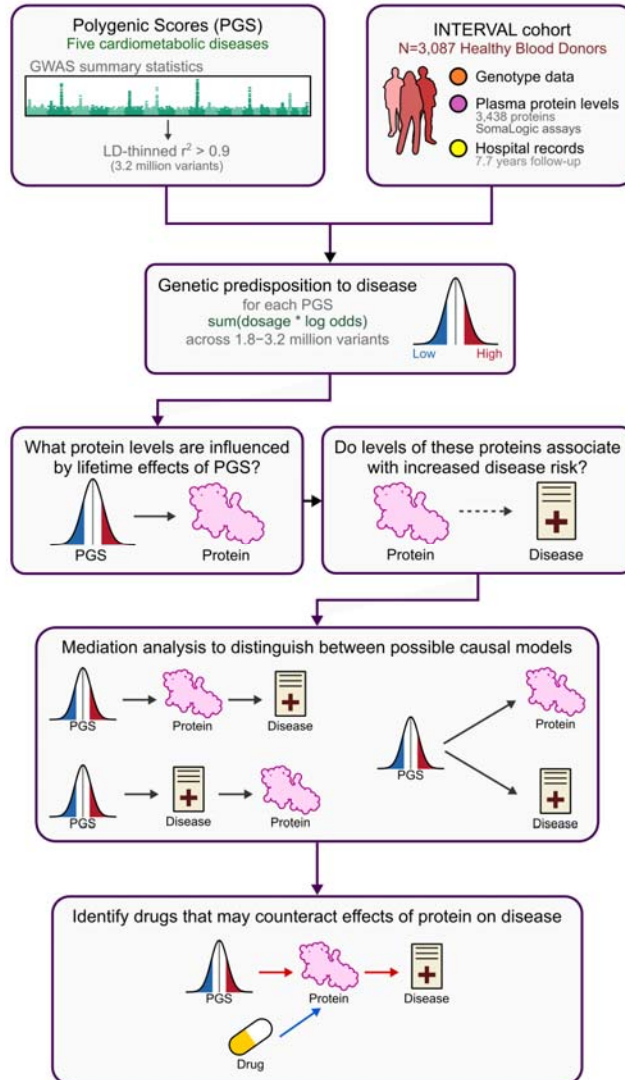



636 **Extended Data Table 1: Cohort characteristics**

|                          |                                                  | Cohort characteristics |
|--------------------------|--------------------------------------------------|------------------------|
| Participants             |                                                  | N=3,087                |
| Women                    |                                                  | N=1,528 (49%)          |
| Age (years)              | Median: 44.0 (Range: 18.0–75.6, IQR: 30.5–54.7)  |                        |
| Weight (kilograms; kg)   | Median: 76.6 (Range: 49.4–177.0, IQR: 66.7–88.0) |                        |
| Height (meters; m)       | Median: 1.73 (Range: 1.07–2.41, IQR: 1.65–1.80)  |                        |
| BMI (kg/m <sup>2</sup> ) | Median: 25.5 (Range: 13.1–81.5, IQR: 23.1–28.5)  |                        |

637

638 IQR: interquartile range. Body mass index (BMI) was computed from self-reported height and weight

639 (**Supplementary Information**).

640 **Extended Data Table 2: Point estimates for PGS to protein to disease associations**

| Protein                                         | Association with PGS for coronary artery disease |                  |                     |                    |              | Association with incident myocardial infarction (N=15 events)  |               |                    | Causal effect of PGS on disease risk through protein |                |         |       |
|-------------------------------------------------|--------------------------------------------------|------------------|---------------------|--------------------|--------------|----------------------------------------------------------------|---------------|--------------------|------------------------------------------------------|----------------|---------|-------|
|                                                 | Beta                                             | 95% CI           | P-value             | FDR                | Polygenicity | HR                                                             | 95% CI        | P-value            | OR                                                   | 95% CI         | P-value | % PGS |
| APOE                                            | 0.081                                            | [0.046, 0.12]    | 6x10 <sup>-6</sup>  | 0.004              | 8.8%         | 1.97                                                           | [1.17, 3.33]  | 0.011              | 1.058                                                | [1.004, 1.11]  | 0.034   | 5.4%  |
| TP53I11                                         | 0.081                                            | [0.046, 0.12]    | 6x10 <sup>-6</sup>  | 0.004              | 9.2%         | 1.92                                                           | [1.14, 3.22]  | 0.014              | 1.060                                                | [0.993, 1.13]  | 0.078   | 5.4%  |
| CRYZL1                                          | 0.081                                            | [0.046, 0.12]    | 6x10 <sup>-6</sup>  | 0.004              | 2.6%         | 1.84                                                           | [1.13, 3.00]  | 0.015              | 1.059                                                | [0.999, 1.12]  | 0.052   | 5.3%  |
| NPTX2                                           | 0.069                                            | [0.034, 0.10]    | 1x10 <sup>-4</sup>  | 0.040              | 2.8%         | 1.55                                                           | [0.959, 2.52] | 0.073              | 1.032                                                | [0.977, 1.090] | 0.26    | 3.0%  |
| GGT2                                            | 0.081                                            | [0.045, 0.12]    | 7x10 <sup>-6</sup>  | 0.004              | 6.2%         | 1.55                                                           | [0.954, 2.52] | 0.077              | 1.036                                                | [0.979, 1.097] | 0.22    | 3.3%  |
| HBQ1                                            | 0.071                                            | [0.036, 0.11]    | 7x10 <sup>-5</sup>  | 0.026              | 3.9%         | 1.52                                                           | [0.937, 2.47] | 0.090              | 1.034                                                | [0.982, 1.088] | 0.21    | 3.1%  |
| CEI                                             | 0.091                                            | [0.056, 0.13]    | 4x10 <sup>-7</sup>  | 0.001              | 1.9%         | 1.46                                                           | [0.89, 2.38]  | 0.14               | 1.026                                                | [0.978, 1.077] | 0.29    | 2.4%  |
| DUSP26                                          | 0.073                                            | [0.037, 0.11]    | 6x10 <sup>-5</sup>  | 0.024              | 12%          | 1.46                                                           | [0.88, 2.43]  | 0.14               | 1.025                                                | [0.980, 1.073] | 0.28    | 2.3%  |
| PCDHB10                                         | 0.070                                            | [0.035, 0.11]    | 9x10 <sup>-5</sup>  | 0.031              | 10%          | 1.38                                                           | [0.85, 2.24]  | 0.19               | 1.022                                                | [0.981, 1.064] | 0.30    | 2.0%  |
| SHBG                                            | -0.079                                           | [-0.11, -0.044]  | 1x10 <sup>-5</sup>  | 0.005              | 17%          | 0.70                                                           | [0.38, 1.29]  | 0.25               | 1.010                                                | [0.980, 1.040] | 0.53    | 0.9%  |
| GRN                                             | 0.082                                            | [0.047, 0.12]    | 5x10 <sup>-6</sup>  | 0.004              | 0.1%         | 1.33                                                           | [0.78, 2.26]  | 0.29               | 1.010                                                | [0.987, 1.034] | 0.38    | 1.0%  |
| Association with PGS for type 2 diabetes        |                                                  |                  |                     |                    |              |                                                                |               |                    |                                                      |                |         |       |
| IGFBP2                                          | -0.095                                           | [-0.13, -0.061]  | 5x10 <sup>-8</sup>  | 6x10 <sup>-5</sup> | 15%          | 0.44                                                           | [0.31, 0.64]  | 2x10 <sup>-5</sup> | 1.097                                                | [1.037, 1.16]  | 0.001   | 13%   |
| CFH                                             | 0.088                                            | [0.054, 0.12]    | 4x10 <sup>-7</sup>  | 3x10 <sup>-4</sup> | 21%          | 2.35                                                           | [1.59, 3.48]  | 2x10 <sup>-5</sup> | 1.064                                                | [1.024, 1.11]  | 0.002   | 8.8%  |
| CPM                                             | 0.096                                            | [0.062, 0.13]    | 3x10 <sup>-8</sup>  | 6x10 <sup>-5</sup> | 22%          | 1.97                                                           | [1.36, 2.87]  | 4x10 <sup>-4</sup> | 1.061                                                | [1.021, 1.10]  | 0.003   | 8.8%  |
| SHBG                                            | -0.11                                            | [-0.14, -0.073]  | 8x10 <sup>-10</sup> | 3x10 <sup>-6</sup> | 23%          | 0.41                                                           | [0.26, 0.62]  | 4x10 <sup>-5</sup> | 1.094                                                | [1.030, 1.16]  | 0.004   | 13%   |
| GHR                                             | 0.071                                            | [0.036, 0.11]    | 6x10 <sup>-5</sup>  | 0.014              | 11%          | 2.28                                                           | [1.53, 3.39]  | 5x10 <sup>-5</sup> | 1.056                                                | [1.013, 1.10]  | 0.009   | 7.9%  |
| CCDC126                                         | -0.070                                           | [-0.10, -0.035]  | 7x10 <sup>-5</sup>  | 0.014              | 10%          | 0.46                                                           | [0.32, 0.68]  | 8x10 <sup>-5</sup> | 1.047                                                | [1.009, 1.088] | 0.016   | 6.9%  |
| PRCP                                            | 0.077                                            | [0.043, 0.11]    | 7x10 <sup>-6</sup>  | 0.003              | 12%          | 1.89                                                           | [1.29, 2.76]  | 1x10 <sup>-3</sup> | 1.046                                                | [1.008, 1.086] | 0.017   | 6.6%  |
| PTPRU                                           | 0.074                                            | [0.040, 0.11]    | 2x10 <sup>-5</sup>  | 0.006              | 18%          | 1.86                                                           | [1.28, 2.70]  | 0.001              | 1.043                                                | [1.006, 1.081] | 0.022   | 6.1%  |
| IGFBP1                                          | -0.073                                           | [-0.11, -0.038]  | 3x10 <sup>-5</sup>  | 0.009              | 18%          | 0.54                                                           | [0.36, 0.81]  | 0.003              | 1.046                                                | [1.005, 1.088] | 0.027   | 6.7%  |
| ADIPOQ                                          | -0.080                                           | [-0.11, -0.046]  | 4x10 <sup>-6</sup>  | 0.002              | 9.3%         | 0.52                                                           | [0.36, 0.76]  | 8x10 <sup>-4</sup> | 1.060                                                | [1.006, 1.12]  | 0.028   | 8.8%  |
| ACY1                                            | 0.077                                            | [0.043, 0.11]    | 8x10 <sup>-6</sup>  | 0.003              | 9.1%         | 1.72                                                           | [1.19, 2.49]  | 0.004              | 1.036                                                | [1.002, 1.071] | 0.035   | 5.1%  |
| CFI                                             | 0.083                                            | [0.049, 0.12]    | 2x10 <sup>-6</sup>  | 1x10 <sup>-3</sup> | 23%          | 1.69                                                           | [1.14, 2.50]  | 0.009              | 1.032                                                | [1.002, 1.064] | 0.037   | 4.6%  |
| ADH4                                            | 0.070                                            | [0.035, 0.10]    | 7x10 <sup>-5</sup>  | 0.014              | 6.5%         | 1.72                                                           | [1.17, 2.54]  | 0.006              | 1.030                                                | [1.001, 1.059] | 0.043   | 4.2%  |
| QPCTL                                           | -0.065                                           | [-0.099, -0.030] | 2x10 <sup>-4</sup>  | 0.027              | 17%          | 0.51                                                           | [0.35, 0.74]  | 5x10 <sup>-4</sup> | 1.043                                                | [1.000, 1.088] | 0.048   | 6.4%  |
| INHBC                                           | 0.066                                            | [0.032, 0.100]   | 2x10 <sup>-4</sup>  | 0.022              | 22%          | 1.65                                                           | [1.11, 2.45]  | 0.013              | 1.025                                                | [1.000, 1.050] | 0.049   | 3.6%  |
| APOF                                            | -0.065                                           | [-0.099, -0.031] | 2x10 <sup>-4</sup>  | 0.026              | 5.0%         | 0.46                                                           | [0.31, 0.67]  | 6x10 <sup>-5</sup> | 1.040                                                | [0.998, 1.085] | 0.061   | 5.9%  |
| GFRA1                                           | 0.068                                            | [0.034, 0.10]    | 9x10 <sup>-5</sup>  | 0.015              | 5.3%         | 1.85                                                           | [1.26, 2.72]  | 0.002              | 1.042                                                | [0.996, 1.090] | 0.074   | 6.0%  |
| PRSS1                                           | -0.086                                           | [-0.12, -0.052]  | 1x10 <sup>-6</sup>  | 5x10 <sup>-4</sup> | 18%          | 0.58                                                           | [0.40, 0.84]  | 0.004              | 1.061                                                | [0.988, 1.14]  | 0.10    | 8.5%  |
| FAH                                             | 0.068                                            | [0.033, 0.10]    | 1x10 <sup>-4</sup>  | 0.018              | 14%          | 1.73                                                           | [1.19, 2.52]  | 0.004              | 1.029                                                | [1.000, 1.058] | 0.054   | 4.1%  |
| ST3GAL2                                         | 0.067                                            | [0.032, 0.10]    | 1x10 <sup>-4</sup>  | 0.021              | 19%          | 1.66                                                           | [1.15, 2.41]  | 0.007              | 1.019                                                | [0.992, 1.047] | 0.17    | 2.8%  |
| FBP1                                            | 0.070                                            | [0.036, 0.10]    | 7x10 <sup>-5</sup>  | 0.014              | 8.6%         | 1.57                                                           | [1.072, 2.30] | 0.021              | 1.014                                                | [0.992, 1.036] | 0.20    | 2.0%  |
| WFIKK2                                          | -0.070                                           | [-0.10, -0.036]  | 6x10 <sup>-5</sup>  | 0.014              | 12%          | 0.65                                                           | [0.44, 0.947] | 0.025              | 1.032                                                | [0.991, 1.075] | 0.11    | 4.6%  |
| RIDA                                            | 0.063                                            | [0.029, 0.097]   | 3x10 <sup>-4</sup>  | 0.036              | 7.5%         | 1.54                                                           | [1.054, 2.25] | 0.026              | 1.020                                                | [0.992, 1.049] | 0.16    | 2.9%  |
| TIMP4                                           | -0.069                                           | [-0.10, -0.035]  | 8x10 <sup>-5</sup>  | 0.015              | 19%          | 0.65                                                           | [0.44, 0.959] | 0.030              | 1.025                                                | [0.994, 1.058] | 0.12    | 3.7%  |
| HS6ST2                                          | -0.067                                           | [-0.10, -0.033]  | 1x10 <sup>-4</sup>  | 0.021              | 23%          | 0.66                                                           | [0.44, 0.991] | 0.045              | 1.017                                                | [0.999, 1.035] | 0.070   | 2.4%  |
| GPD1                                            | 0.066                                            | [0.031, 0.10]    | 2x10 <sup>-4</sup>  | 0.024              | 12%          | 1.44                                                           | [0.982, 2.11] | 0.062              | 1.018                                                | [0.992, 1.045] | 0.18    | 2.6%  |
| MUSK                                            | 0.090                                            | [0.056, 0.12]    | 3x10 <sup>-7</sup>  | 2x10 <sup>-4</sup> | 16%          | 1.44                                                           | [0.982, 2.10] | 0.062              | 1.025                                                | [0.996, 1.056] | 0.097   | 3.5%  |
| CHGB                                            | -0.075                                           | [-0.11, -0.041]  | 2x10 <sup>-5</sup>  | 0.005              | 10%          | 0.74                                                           | [0.51, 1.081] | 0.12               | 1.020                                                | [0.988, 1.052] | 0.23    | 2.8%  |
| CYB5R3                                          | -0.062                                           | [-0.096, -0.027] | 4x10 <sup>-4</sup>  | 0.049              | 9.1%         | 0.74                                                           | [0.51, 1.086] | 0.12               | 1.015                                                | [0.995, 1.036] | 0.13    | 2.2%  |
| MSMP                                            | -0.068                                           | [-0.10, -0.034]  | 1x10 <sup>-4</sup>  | 0.017              | 8.7%         | 0.74                                                           | [0.51, 1.087] | 0.13               | 1.021                                                | [0.985, 1.060] | 0.26    | 3.0%  |
| FAM20A                                          | 0.063                                            | [0.029, 0.098]   | 3x10 <sup>-4</sup>  | 0.036              | 12%          | 1.27                                                           | [0.87, 1.86]  | 0.21               | 1.009                                                | [0.991, 1.028] | 0.31    | 1.3%  |
| Association with PGS for chronic kidney disease |                                                  |                  |                     |                    |              |                                                                |               |                    |                                                      |                |         |       |
| VWC2                                            | 0.094                                            | [0.056, 0.13]    | 1x10 <sup>-6</sup>  | 0.002              | 21%          | Association with incident end stage renal disease (N=0 events) |               |                    |                                                      |                |         |       |
| B2M                                             | 0.094                                            | [0.056, 0.13]    | 1x10 <sup>-6</sup>  | 0.002              | 9.4%         |                                                                |               |                    |                                                      |                |         |       |
| CST3                                            | 0.085                                            | [0.047, 0.12]    | 1x10 <sup>-5</sup>  | 0.010              | 7.0%         |                                                                |               |                    |                                                      |                |         |       |
| UST                                             | -0.081                                           | [-0.12, -0.042]  | 4x10 <sup>-5</sup>  | 0.023              | 12%          |                                                                |               |                    |                                                      |                |         |       |
| C1GALT1C1                                       | -0.079                                           | [-0.12, -0.041]  | 5x10 <sup>-5</sup>  | 0.026              | 5.6%         |                                                                |               |                    |                                                      |                |         |       |
| FTMT                                            | -0.11                                            | [-0.15, -0.076]  | 4x10 <sup>-9</sup>  | 1x10 <sup>-5</sup> | 0.1%         |                                                                |               |                    |                                                      |                |         |       |
| PRSS3                                           | 0.082                                            | [0.043, 0.12]    | 3x10 <sup>-5</sup>  | 0.020              | 0.2%         |                                                                |               |                    |                                                      |                |         |       |
| PDE4D/A                                         | -0.076                                           | [-0.11, -0.038]  | 9x10 <sup>-5</sup>  | 0.040              | 0.1%         |                                                                |               |                    |                                                      |                |         |       |
| Association with PGS for ischaemic stroke       |                                                  |                  |                     |                    |              |                                                                |               |                    |                                                      |                |         |       |
| SHBG                                            | -0.076                                           | [-0.11, -0.042]  | 1x10 <sup>-5</sup>  | 0.041              | 17%          | Association with incident ischaemic stroke (N=3 events)        |               |                    |                                                      |                |         |       |

642 Beta: standard deviation change in protein levels per standard deviation increase in PGS. 95% CI: 95%  
643 confidence interval. HR: hazard ratio for incident disease conferred per standard deviation increase in  
644 protein levels. OR: odds ratio for incident disease adjusting for age and sex conferred through each protein  
645 per standard deviation increase in PGS. % PGS: Percentage of total effect of PGS on incident disease  
646 conferred through protein levels. The total odds ratio for MI conferred per standard deviation increase in  
647 CAD PGS was 2.94 (95% CI: 1.69–5.31, P-value: 2x10<sup>-4</sup>). The total odds ratio for T2D conferred per  
648 standard deviation increase T2D PGS was 2.00 (95% CI: 1.37–2.96, P-value: 4x10<sup>-4</sup>). Point estimates are  
649 greyed out where P-value > 0.05

### 650 Extended Data Table 3: Information about each PGS associated protein

| Protein   | UniProt | Gene             | Chr | Start       | PGS             | Aptamer             | Aptamer target                                                            |
|-----------|---------|------------------|-----|-------------|-----------------|---------------------|---------------------------------------------------------------------------|
| ACY1      | Q03154  | <i>ACY1</i>      | 3   | 52,017,300  | T2D             | 3343-1              | Aminoacylase-1                                                            |
| ADH4      | P08319  | <i>ADH4</i>      | 4   | 100,044,832 | T2D             | 8325-37             | Alcohol dehydrogenase 4                                                   |
| ADIPOQ    | Q15848  | <i>ADIPOQ</i>    | 3   | 186,560,463 | T2D             | 3554-24             | Adiponectin                                                               |
| APOE*     | P02649  | <i>APOE</i>      | 19  | 45,409,039  | CAD             | 2418-55             | Apolipoprotein E, isoforms E3 and E4                                      |
| APOF      | Q13790  | <i>APOF</i>      | 12  | 56,754,355  | T2D             | 12370-30            | Apolipoprotein F                                                          |
| B2M       | P61769  | <i>B2M</i>       | 15  | 45,003,685  | CKD             | 3485-28             | Beta-2-microglobulin                                                      |
| C1GALT1C1 | Q96EU7  | <i>C1GALT1C1</i> | X   | 119,759,529 | CKD             | 5735-54             | C1GALT1-specific chaperone 1                                              |
| CCDC126   | Q96EE4  | <i>CCDC126</i>   | 7   | 23,636,998  | T2D             | 6388-21             | Coiled-coil domain-containing protein 126                                 |
| CEI       | Q86S19  | <i>C5orf38</i>   | 5   | 2,752,058   | CAD             | 6378-2              | Protein CEI                                                               |
| CFH       | P08603  | <i>CFH</i>       | 1   | 196,621,008 | T2D             | 4159-130            | Complement factor H                                                       |
| CFI       | P05156  | <i>CFI</i>       | 4   | 110,661,848 | T2D             | 2567-5              | Complement factor I                                                       |
| CHGB      | P05060  | <i>CHGB</i>      | 20  | 5,891,974   | T2D             | 8235-48             | Secretogranin-1                                                           |
| CPM       | P14384  | <i>CPM</i>       | 12  | 69,244,955  | T2D             | 7768-10             | Carboxypeptidase M                                                        |
| CRYZL1    | O95825  | <i>CRYZL1</i>    | 21  | 34,961,647  | CAD             | 9207-60             | Quinone oxidoreductase-like protein 1                                     |
| CST3      | P01034  | <i>CST3</i>      | 20  | 23,608,534  | CKD             | 2609-59             | Cystatin-C                                                                |
| CYB5R3    | P00387  | <i>CYB5R3</i>    | 22  | 43,013,846  | T2D             | 7215-18             | NADH-cytochrome b5 reductase 3                                            |
| DUSP26    | Q9BV47  | <i>DUSP26</i>    | 8   | 33,448,848  | CAD             | 8967-6              | Dual specificity protein phosphatase 26                                   |
| FAH       | P16930  | <i>FAH</i>       | 15  | 80,445,233  | T2D             | 11424-4             | Fumarylacetoacetase                                                       |
| FAM20A    | Q96MK3  | <i>FAM20A</i>    | 17  | 66,531,257  | T2D             | 6433-57             | Pseudokinase FAM20A                                                       |
| FBP1      | P09467  | <i>FBP1</i>      | 9   | 97,365,415  | T2D             | 7206-20             | Fructose-1,6-bisphosphatase 1                                             |
| FTMT      | Q8N4E7  | <i>FTMT</i>      | 5   | 121,187,650 | CKD             | 8048-9              | Ferritin, mitochondrial                                                   |
| GFRA1     | P56159  | <i>GFRA1</i>     | 10  | 117,816,436 | T2D             | 3314-74             | GDNF family receptor alpha-1                                              |
| GGT2      | P36268  | <i>GGT2</i>      | 22  | 21,562,261  | CAD             | 6334-9              | Inactive gamma-glutamyltranspeptidase 2                                   |
| GHR       | P10912  | <i>GHR</i>       | 5   | 42,423,577  | T2D             | 2948-58             | Growth hormone receptor                                                   |
| GPD1      | P21695  | <i>GPD1</i>      | 12  | 50,497,602  | T2D             | 13697-51<br>11081-1 | Glycerol-3-phosphate dehydrogenase [NAD(+)], cytoplasmic                  |
| GRN       | P28799  | <i>GRN</i>       | 17  | 42,422,491  | CAD             | 4992-49             | Granulins                                                                 |
| HBQ1      | P09105  | <i>HBQ1</i>      | 16  | 230,333     | CAD             | 7965-25             | Hemoglobin subunit theta-1                                                |
| HS6ST2    | Q96MM7  | <i>HS6ST2</i>    | X   | 131,760,038 | T2D             | 13524-25            | Heparan-sulfate 6-O-sulfotransferase 2                                    |
| IGFBP1    | P08833  | <i>IGFBP1</i>    | 7   | 45,927,959  | T2D             | 13741-36<br>2771-35 | Insulin-like growth factor-binding protein 1                              |
| IGFBP2    | P18065  | <i>IGFBP2</i>    | 2   | 217,498,127 | T2D             | 2570-72<br>8469-41  | Insulin-like growth factor-binding protein 2                              |
| INHBC     | P55103  | <i>INHBC</i>     | 12  | 57,828,543  | T2D             | 6408-2              | Inhibin beta C chain                                                      |
| MSMP      | Q116U9  | <i>MSMP</i>      | 9   | 35,752,987  | T2D             | 8080-24             | Prostate-associated microseminoprotein                                    |
| MUSK      | O15146  | <i>MUSK</i>      | 9   | 113,430,935 | T2D             | 11547-84            | Muscle, skeletal receptor tyrosine-protein kinase                         |
| NPTX2     | P47972  | <i>NPTX2</i>     | 7   | 98,246,597  | CAD             | 6521-35             | Neuronal pentraxin-2                                                      |
| PCDHB10   | Q9UN67  | <i>PCDHB10</i>   | 5   | 140,571,952 | CAD             | 9963-19             | Protocadherin beta-10                                                     |
| PDE4D/A*  | Q08499  | <i>PDE4D</i>     | 5   | 58,264,865  | CKD             | 5255-22             | Combined levels of cAMP-specific 3',5'-cyclic phosphodiesterase 4D and 4A |
|           | P27815  | <i>PDE4A</i>     | 19  | 10,527,449  |                 |                     |                                                                           |
| PRCP      | P42785  | <i>PRCP</i>      | 11  | 82,535,409  | T2D             | 5722-78             | Lysosomal Pro-X carboxypeptidase                                          |
| PRSS1     | P07477  | <i>PRSS1</i>     | 7   | 142,457,319 | T2D             | 3049-61             | Trypsin-1                                                                 |
| PRSS3     | P35030  | <i>PRSS3</i>     | 9   | 33,750,464  | CKD             | 3479-71             | Trypsin-3                                                                 |
| PTPRU     | Q92729  | <i>PTPRU</i>     | 1   | 29,563,028  | T2D             | 8337-65             | Receptor-type tyrosine-protein phosphatase U                              |
| QPCTL     | Q9NXS2  | <i>QPCTL</i>     | 19  | 46,195,741  | T2D             | 8866-53             | Glutamyl-peptide cyclotransferase-like protein                            |
| RIDA      | P52758  | <i>RIDA</i>      | 8   | 99,114,567  | T2D             | 14636-25            | Ribonuclease UK114                                                        |
| SHBG      | P04278  | <i>SHBG</i>      | 17  | 7,517,382   | CAD,<br>IS, T2D | 7909-37<br>4929-55  | Sex hormone-binding globulin                                              |
| ST3GAL2   | Q16842  | <i>ST3GAL2</i>   | 16  | 70,413,338  | T2D             | 6281-51             | CMP-N-acetylneuraminase-beta-galactosamide-alpha-2,3-sialyltransferase 2  |
| TIMP4     | Q99727  | <i>TIMP4</i>     | 3   | 12,194,568  | T2D             | 6462-12             | Metalloproteinase inhibitor 4                                             |
| TP53I11   | O14683  | <i>TP53I11</i>   | 11  | 44,907,454  | CAD             | 13022-20            | Tumor protein p53-inducible protein 11                                    |
| UST       | Q9Y2C2  | <i>UST</i>       | 6   | 149,068,063 | CKD             | 8364-74             | Uronyl 2-sulfotransferase                                                 |
| VWC2      | Q2TAL6  | <i>VWC2</i>      | 7   | 49,813,257  | CKD             | 11121-56            | Bronin                                                                    |
| WFIKKN2   | Q8TEU8  | <i>WFIKKN2</i>   | 17  | 48,912,011  | T2D             | 3235-50<br>13408-23 | WAP, Kazal, immunoglobulin, Kunitz and NTR domain-containing protein 2    |

651

652 Aptamer: Sequence ID for the SomaLogic aptamer(s) targeting the protein. A \* next to the protein name  
653 indicates the aptamer(s) binds to specific isoforms of the listed protein or binds to multiple proteins; see  
654 Aptamer target column. Extended details on aptamer sensitivity and specificity can be found in  
655 **Supplementary Table 2.**

656 **Extended Data Table 4: Previous evidence for PGS-associated proteins in disease**

657

| Coronary artery disease                 |                                                                                                                                                                                                                                                                                                                                                                                                                                                                                                                                                                                                                                                             |
|-----------------------------------------|-------------------------------------------------------------------------------------------------------------------------------------------------------------------------------------------------------------------------------------------------------------------------------------------------------------------------------------------------------------------------------------------------------------------------------------------------------------------------------------------------------------------------------------------------------------------------------------------------------------------------------------------------------------|
| Disease association previously observed | APOE <sup>24,25</sup> , CEI <sup>63</sup> , GGT2 <sup>64,65</sup> , GRN <sup>66</sup> , SHBG <sup>67-69</sup>                                                                                                                                                                                                                                                                                                                                                                                                                                                                                                                                               |
| No reported association                 | CRYZL1, DUSP26, HBQ1, NPTX2, PCDBH10, TP53I11                                                                                                                                                                                                                                                                                                                                                                                                                                                                                                                                                                                                               |
| Chronic kidney disease                  |                                                                                                                                                                                                                                                                                                                                                                                                                                                                                                                                                                                                                                                             |
| Disease association previously observed | B2M <sup>23</sup> , C1GALT1C1 <sup>70</sup> , CST3 <sup>23</sup> , PDE4A <sup>71</sup> , PDE4D <sup>71</sup> , VWC2 <sup>72</sup>                                                                                                                                                                                                                                                                                                                                                                                                                                                                                                                           |
| No reported association                 | FTMT, PRSS3, UST                                                                                                                                                                                                                                                                                                                                                                                                                                                                                                                                                                                                                                            |
| Ischaemic stroke                        |                                                                                                                                                                                                                                                                                                                                                                                                                                                                                                                                                                                                                                                             |
| Disease association previously observed | SHBG <sup>73</sup>                                                                                                                                                                                                                                                                                                                                                                                                                                                                                                                                                                                                                                          |
| Type 2 diabetes                         |                                                                                                                                                                                                                                                                                                                                                                                                                                                                                                                                                                                                                                                             |
| Disease association previously observed | ACY1 <sup>74,75</sup> , ADIPOQ <sup>75,76</sup> , APOF <sup>77</sup> , CCDC126 <sup>78</sup> , CFH <sup>75</sup> , CFI <sup>75</sup> , CHGB <sup>79</sup> , CPM <sup>77</sup> , CYB5R3 <sup>80</sup> , FAH <sup>81</sup> , FBP1 <sup>26,32</sup> , GFRA1 <sup>75,77</sup> , GHR <sup>36,77</sup> , GPD1 <sup>77</sup> , HS6ST2 <sup>77</sup> , IGFBP1 <sup>82</sup> , IGFBP2 <sup>77</sup> , INHBC <sup>77</sup> , MSMP <sup>77</sup> , PRCP <sup>77,83</sup> , PRSS1 <sup>77</sup> , PTPRU <sup>77</sup> , QPCTL <sup>84,85</sup> , RIDA <sup>77,86</sup> , SHBG <sup>87</sup> , ST3GAL2 <sup>88</sup> , TIMP4 <sup>91,89</sup> , WFIKKN2 <sup>75,77</sup> |
| No reported association                 | MUSK, ADH4, FAM20A                                                                                                                                                                                                                                                                                                                                                                                                                                                                                                                                                                                                                                          |

658

659 **Extended Data Figure 2: Robustness of PGS to protein associations**

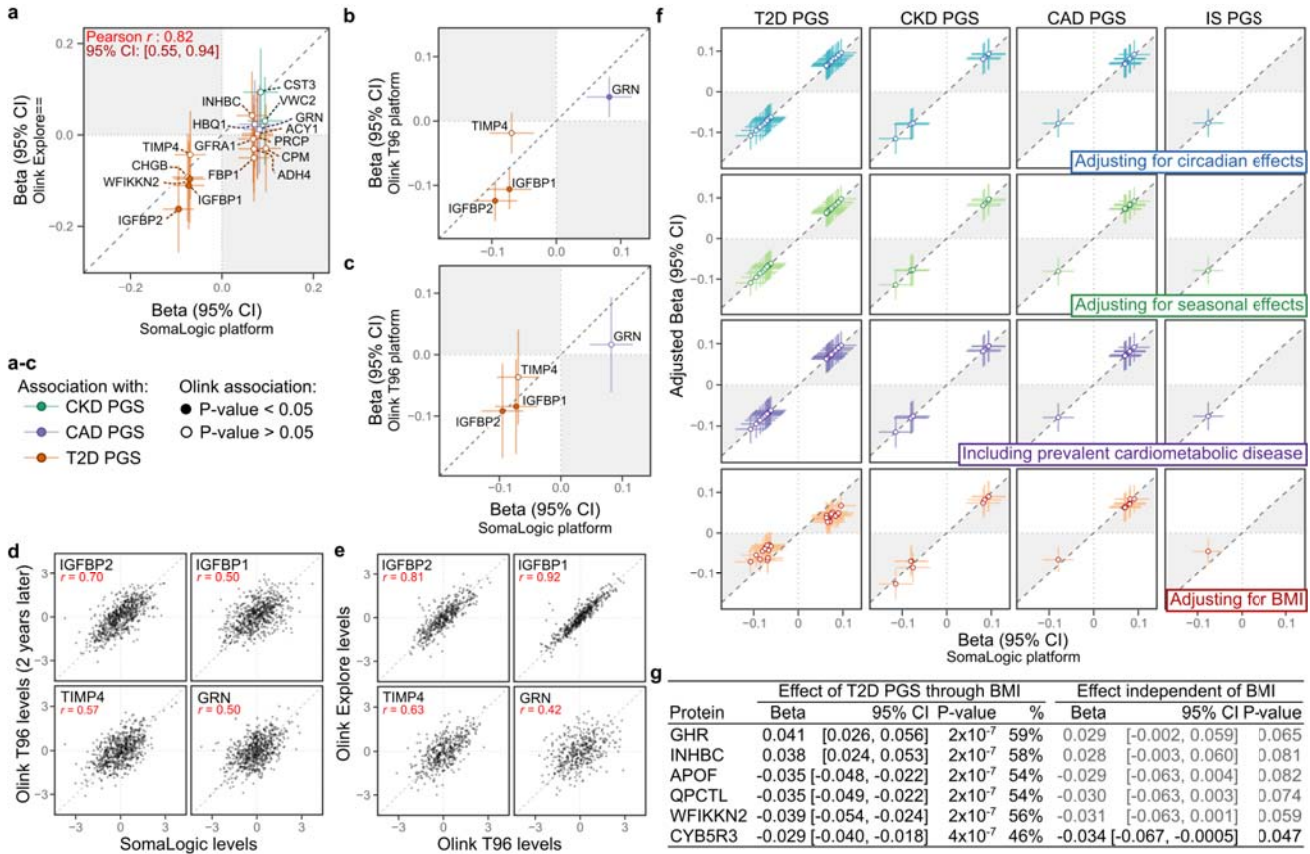

660

661 **a-c)** Robustness of PGS to protein associations to proteomics technology. **c)** Longitudinal stability of PGS  
 662 to protein associations. **d)** Longitudinal stability of protein levels. **d-e)** Robustness of protein levels to  
 663 proteomics technology. **f)** Robustness of PGS to protein associations to environmental and physiological  
 664 confounding. **g)** Mediation of PGS to protein associations through body mass index (BMI) for six proteins  
 665 associated with PGS for type 2 diabetes. **a)** Compares associations between PGSs and protein levels  
 666 quantified by SomaLogic SOMAscan aptamers (x-axis; **Fig. 1b**) to associations with protein levels  
 667 quantified using the Olink Explore platform in 418 independent INTERVAL participants (y-axis) with no  
 668 prevalent cardiometabolic disease (**Supplementary Information**). In total 1,463 proteins were quantified  
 669 by the Olink Explore platform, including 907 quantified by the SomaLogic platform, and among these 16  
 670 of the 49 PGS-associated proteins. Points correspond to PGS to protein level association beta estimates, and  
 671 the bars to their 95% confidence intervals. **b)** Compares associations between PGSs and protein levels  
 672 quantified by SomaLogic SOMAscan aptamers (x-axis; **Fig. 1b**) to associations with protein levels  
 673 quantified using the Olink T96 platform in 3,848 independent INTERVAL participants. In total 265  
 674 proteins were quantified by the Olink T96 platform, including 224 quantified by the SomaLogic platform,  
 675 and among these, 4 of the 49 PGS-associated proteins. **c)** Compares PGS to protein associations in 646  
 676 participants with protein levels quantified by both the SomaLogic platform and Olink T96 platform (from  
 677 blood samples taken after 2 years of follow-up). **a-c)** share common x-axes and legend. Point estimates for  
 678 associations between PGS and protein levels assessed by Olink proteomics in each panel are given in  
 679 **Supplementary Data 3b**. **d)** Compares protein levels quantified by the SomaLogic platform (x-axes) to  
 680 protein levels quantified by the Olink T96 platform (y-axes) after two years of follow-up in 646  
 681 participants. **e)** Compares protein levels quantified by the Olink T96 platform (x-axes) to protein levels

682 quantified by the Olink Explore platform (y-axes). **f)** Compares PGS to protein associations before (x-axes;  
683 **Fig. 1a**) and after (y-axes) adjustment for circadian effects (time of day of blood draw), adjustment for  
684 seasonal effects (date of blood draw), when including 87 participants with prevalent cardiometabolic  
685 disease, and adjustment for BMI. To capture the potentially non-linear effects of circadian rhythm and  
686 season on protein levels both were treated as categorical variables with 10 groups of equal length duration,  
687 using the group with the largest sample size as the reference in the model (**Supplementary Information**).  
688 Point estimates in sensitivity analyses are given in **Supplementary Data 3c. g)** For the six proteins whose  
689 association T2D PGS was attenuated ( $P > 0.05$ ; **Extended Data Fig. 2f**) gives, from mediation analysis  
690 (**Online Methods**), the estimated effect of T2D PGS on the protein levels through BMI (standard deviation  
691 change in protein levels through BMI per standard deviation increase in T2D PGS) and the estimated effect  
692 of T2D PGS on protein levels independent of BMI. 95% CI: 95% confidence interval.

693 **Extended Data Figure 3: Polygenicity of PGS to protein associations**

694

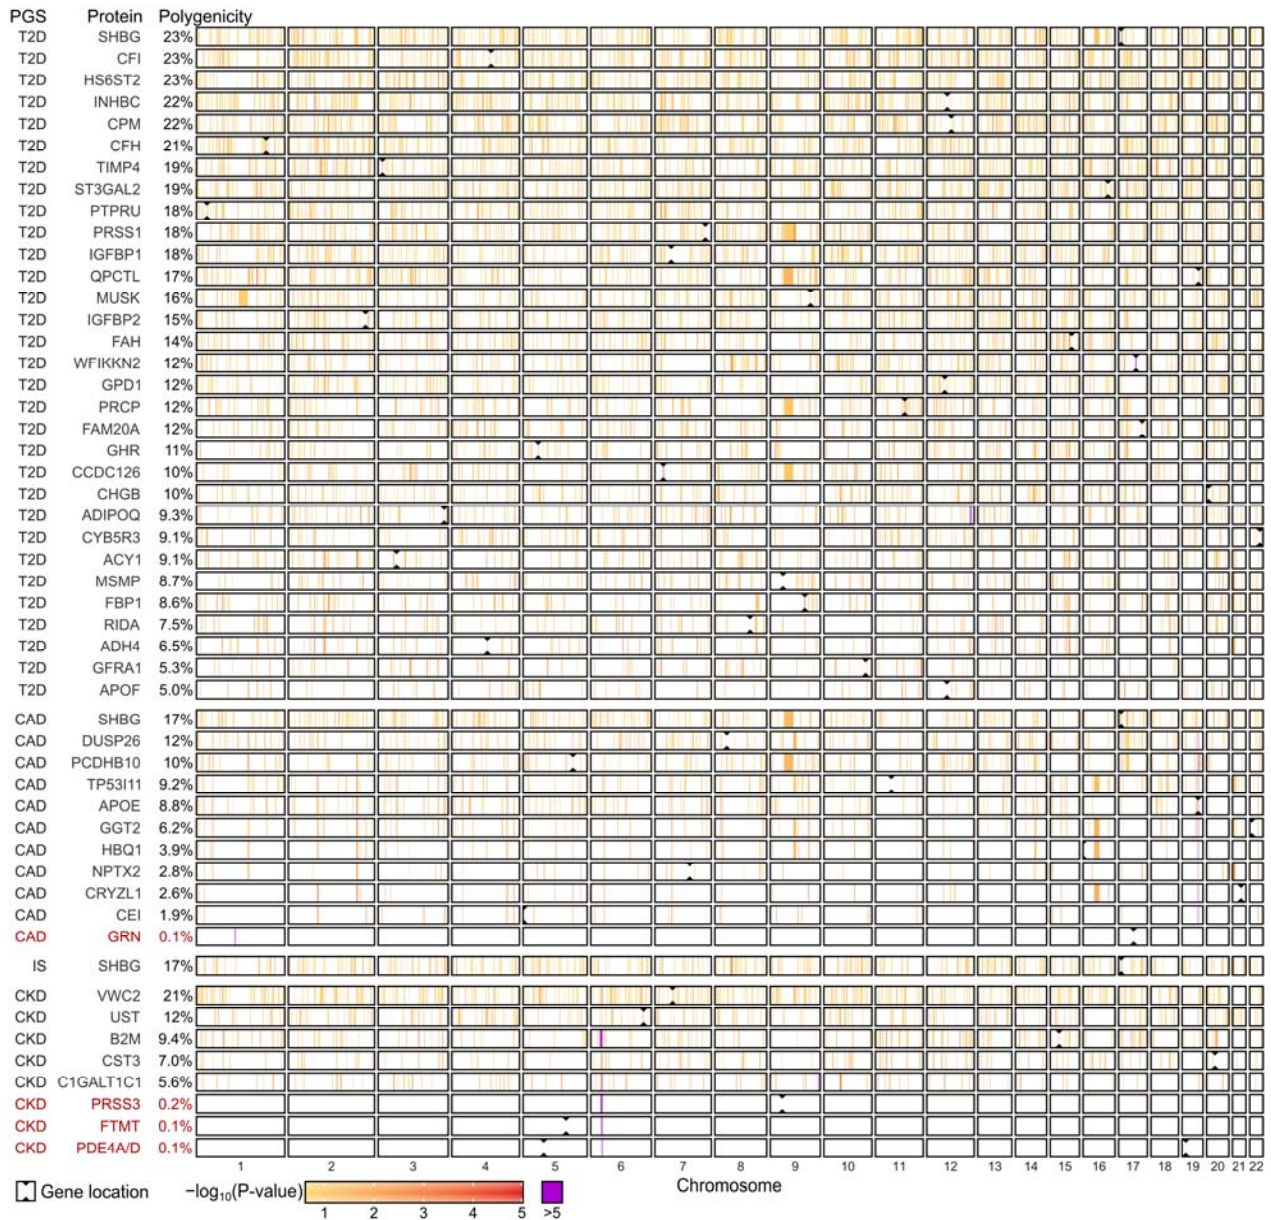

707 **Extended Data Figure 4: Incident disease and PGS validity**

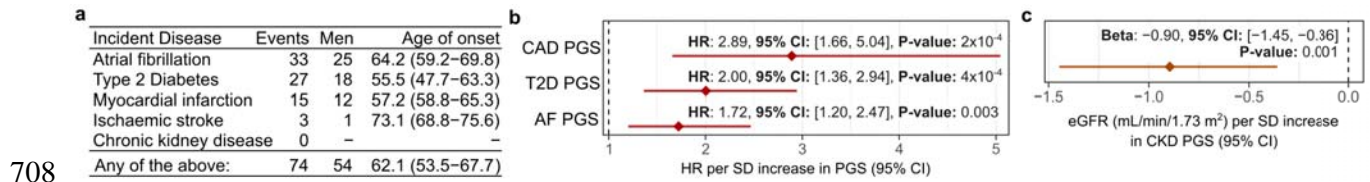

709 **a)** Incident disease events over the 7.7 year of follow-up in the 3,087 INTERVAL participants. Endpoint:  
 710 incident disease definition available in INTERVAL for the relevant PGS, as defined by CALIBER  
 711 phenotyping algorithms (**Online Methods**). Age of onset: median age of first hospitalisation with the  
 712 respective endpoint. Numbers in brackets gives the interquartile range. **b)** Hazard ratio (HR) and 95%  
 713 confidence interval (95% CI) conferred per standard deviation increase of the respective PGS on risk of  
 714 hospitalisation with the relevant endpoint. CAD PGS was tested for incident myocardial infarction. Hazard  
 715 ratios were fit using cox proportional hazards models, adjusting for age and sex, and 10 genetic PCs. **c)**  
 716 Association between PGS for chronic kidney disease with estimated glomerular filtration rate (eGFR), a  
 717 marker of renal function used in chronic kidney disease diagnosis (**Online Methods**): decreased eGFR is  
 718 indicative of reduced renal function. EGFR was computed from serum creatinine in 3,307 participants  
 719 using the CKD-EPI equation (**Supplementary Information**). Association was fit with linear regression  
 720 adjusting for age and sex, and 10 genetic PCs.



721 **Extended Data Figure 5: Mendelian randomisation analysis**

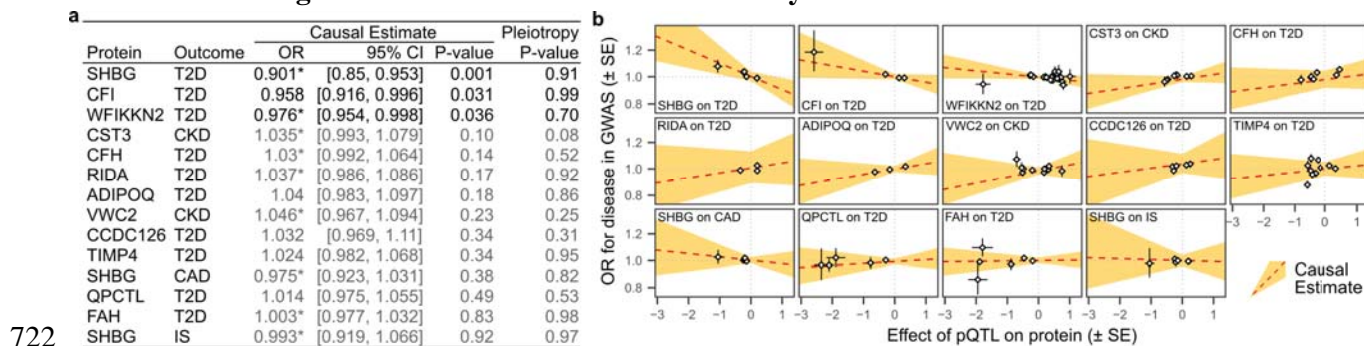

723 **a**) Causal effects of protein levels on disease risk estimated through two-sample Mendelian randomisation  
724 analysis of pQTL summary statistics and disease GWAS summary statistics (**Online Methods**). OR:  
725 consensus estimate of the odds ratio conferred per standard deviation increase in protein levels across five  
726 Mendelian randomisation methods (**Supplementary Information; Supplementary Table 5**). \* Estimated  
727 causal effect is directionally consistent with PGS to protein to disease associations in **Fig. 2**. 95% CI: 95%  
728 confidence interval. Pleiotropy P-value: P-value for the intercept term in Egger regression, which indicates  
729 where  $P < 0.05$ , confounding of the causal estimate by associations between genetic instruments (*cis*-  
730 pQTLs) with multiple disease risk factors (horizontal pleiotropy). Entries are greyed out where  $P > 0.05$ . **b**)  
731 Dose response curves showing the estimated causal effect of changes in protein levels on disease risk for  
732 each protein and disease. The slope of the orange dashed line corresponds to the estimated causal effect  
733 (Odds Ratio from **Extended Data Fig. 5a**). The yellow ribbon shows the 95% confidence interval for the  
734 estimated causal effect (slope), accounting also for the 95% confidence interval for the intercept term in  
735 Egger regression. Points on each plot show the *cis*-pQTLs used as genetic instruments for each test  
736 (**Supplementary Table 6**). On the x-axes, points show the standard deviation change in protein levels per  
737 copy of the minor allele, and horizontal bars indicate the standard error. On the y-axes, points show odds  
738 ratio conferred per copy of the minor allele, and vertical bars indicate the standard error.

739 **Extended Data Table 5: PGS-associated drug targets**

| PGS | Protein | Drugs | Approved | Summary of approved compound usage                                                                                      |
|-----|---------|-------|----------|-------------------------------------------------------------------------------------------------------------------------|
| T2D | ACY1    | 3     | 3        | Malnutrition, overdose.                                                                                                 |
| T2D | ADH4    | 3     | 2        | Female reproductive disorders, infection control.                                                                       |
| CAD | APOE    | 5     | 5        | Zinc deficiency.                                                                                                        |
| CKD | B2M     | 4     | 2        | Pain management, diarrhoea.                                                                                             |
| T2D | CFH     | 5     | 5        | Zinc deficiency, malnutrition, ear and respiratory infections.                                                          |
| T2D | CFI     | 3     | 3        | Zinc deficiency, malnutrition, ear and respiratory infections.                                                          |
| T2D | CYB5R3  | 3     | 3        | Fertility and reproductive treatments, zinc deficiency, vitamin B12 deficiency                                          |
| T2D | FBP1    | 11    | 1        | Artificial sweetener.                                                                                                   |
| T2D | GHR     | 3     | 2        | Acromegaly, dwarfism, idiopathic short stature, HIV weight loss.                                                        |
| T2D | GPD1    | 2     | 2        | Glycaemic control, type 2 diabetes, female reproductive disorders.                                                      |
| T2D | IGFBP1  | 1     | 1        | Growth failure due to IGF-1 deficiency                                                                                  |
| T2D | IGFBP2  | 1     | 1        | Growth failure due to IGF-1 deficiency                                                                                  |
| T2D | MUSK    | 1     | 1        | Rheumatoid arthritis, chronic immune thrombocytopenia                                                                   |
| CKD | PDE4A   | 16    | 10       | Respiratory diseases, atopic dermatitis, hypertension, congestive heart failure, bowel disorders.                       |
| CKD | PDE4D   | 23    | 5        | Respiratory diseases, atopic dermatitis, hypertension.                                                                  |
| CAD |         |       |          |                                                                                                                         |
| IS  | SHBG    | 68    | 49       | Fertility and reproductive treatments, cancers, mental health, developmental disorders, hypertension, high cholesterol. |
| T2D |         |       |          |                                                                                                                         |
| T2D | FAH     | 3     | 0        | -                                                                                                                       |
| T2D | PRSS1   | 101   | 0        | -                                                                                                                       |
| CKD | PRSS3   | 8     | 0        | -                                                                                                                       |

740  
741 Number of drugs interacting with each PGS-associated protein, the number approved for therapeutic use,  
742 and a summary of the therapeutic uses of these compounds. Information was retrieved from DrugBank  
743 version 5.17 (**Online Methods**). **Supplementary Table 7** provides details for each of the 236 drugs or  
744 compounds targeting any PGS-associated protein.
